# Supplementary material for: Intestinal protection by proanthocyanidins involves anti-oxidative and anti-inflammatory actions in association with an improvement of insulin sensitivity, lipid and glucose homeostasis
Source: PubMed Central journal article supplement (PMC7886900; doi:10.1038/s41598-020-80587-5), 2021-02-16

# Villin

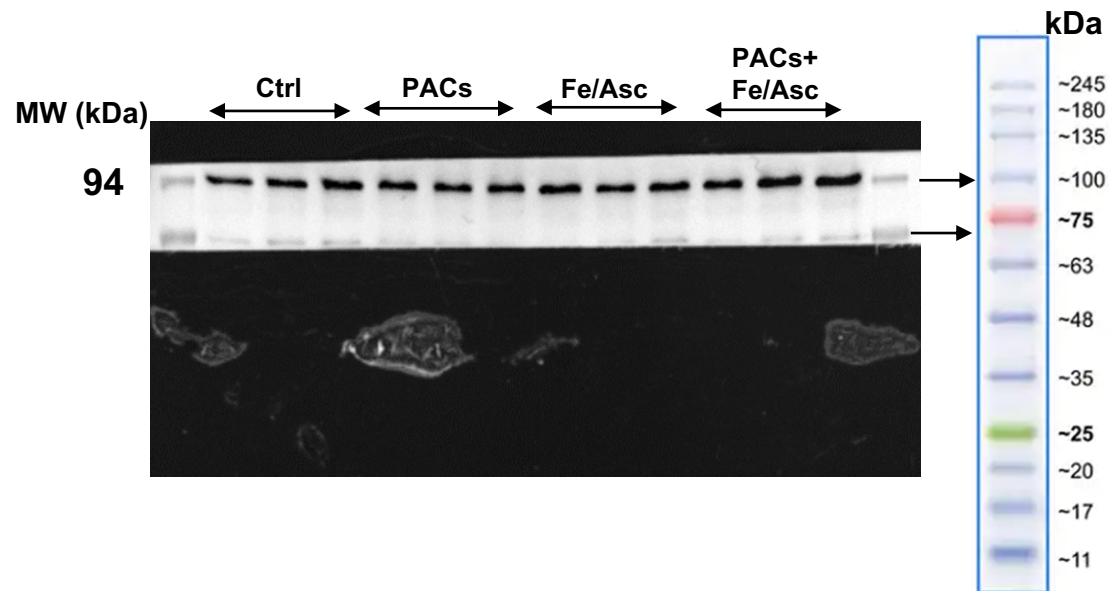

# Occludin

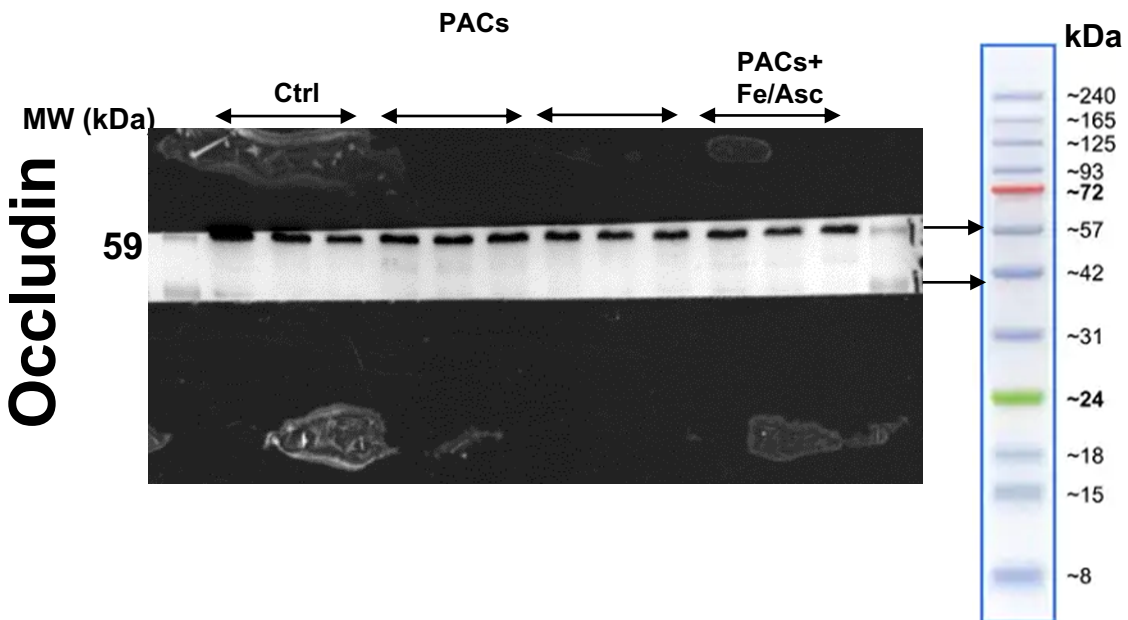

# $\beta$ -actin

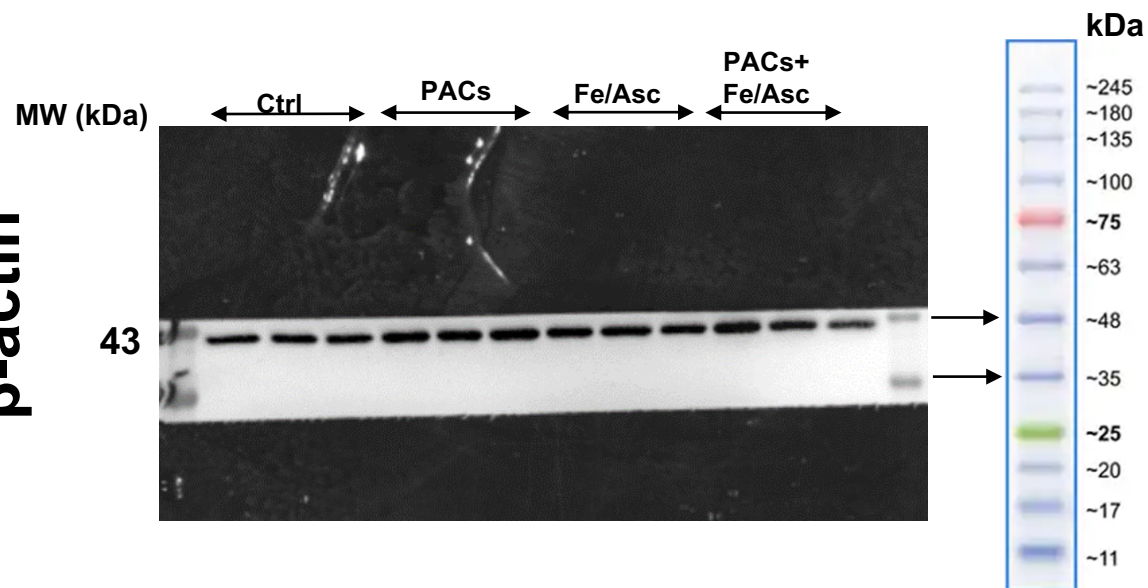

# $\beta$ -actin

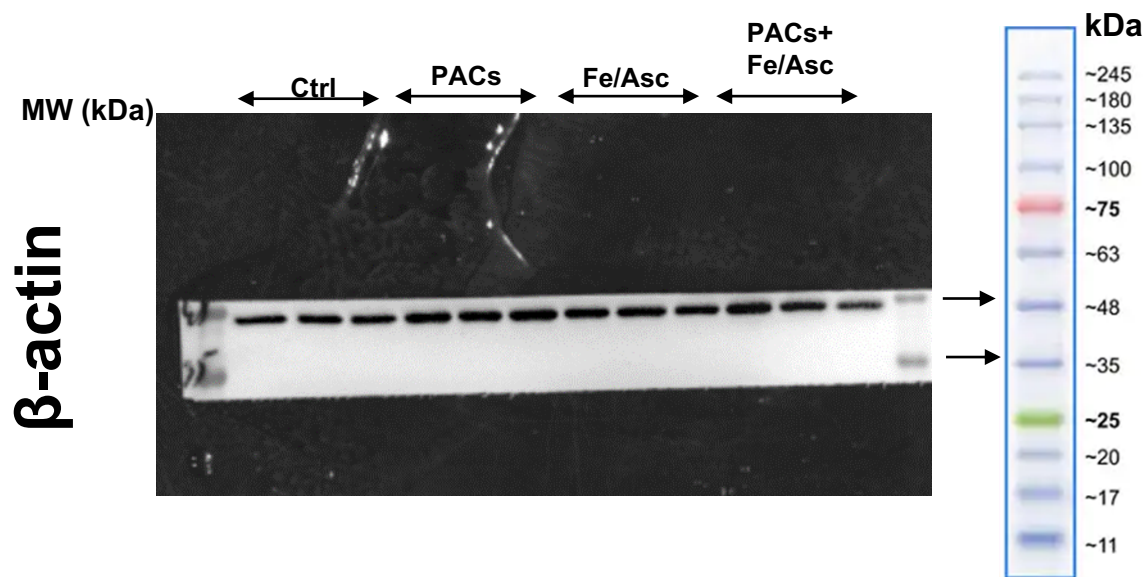

# Claudin

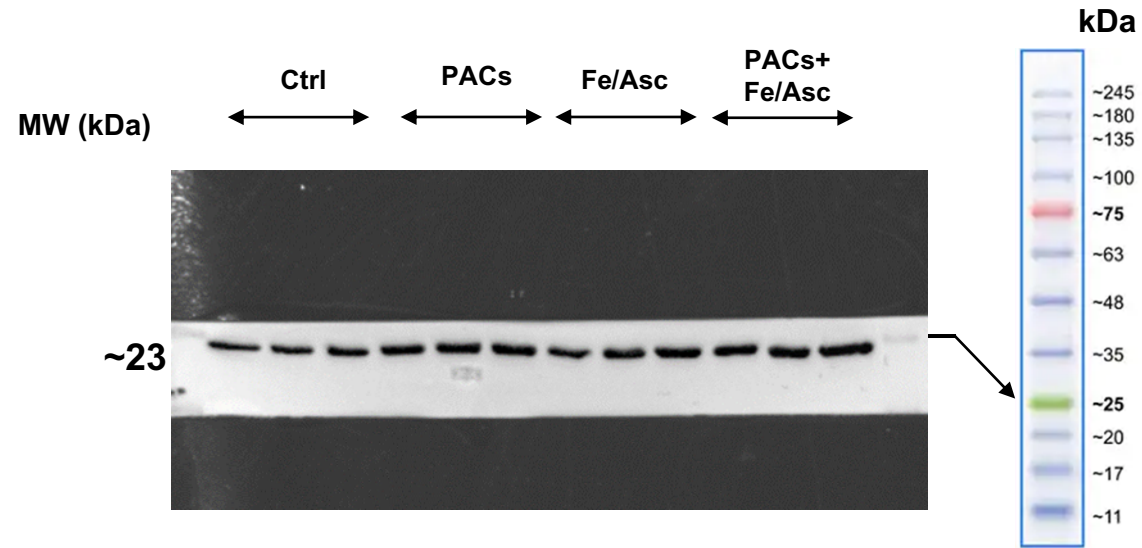

# $\beta$ -actin

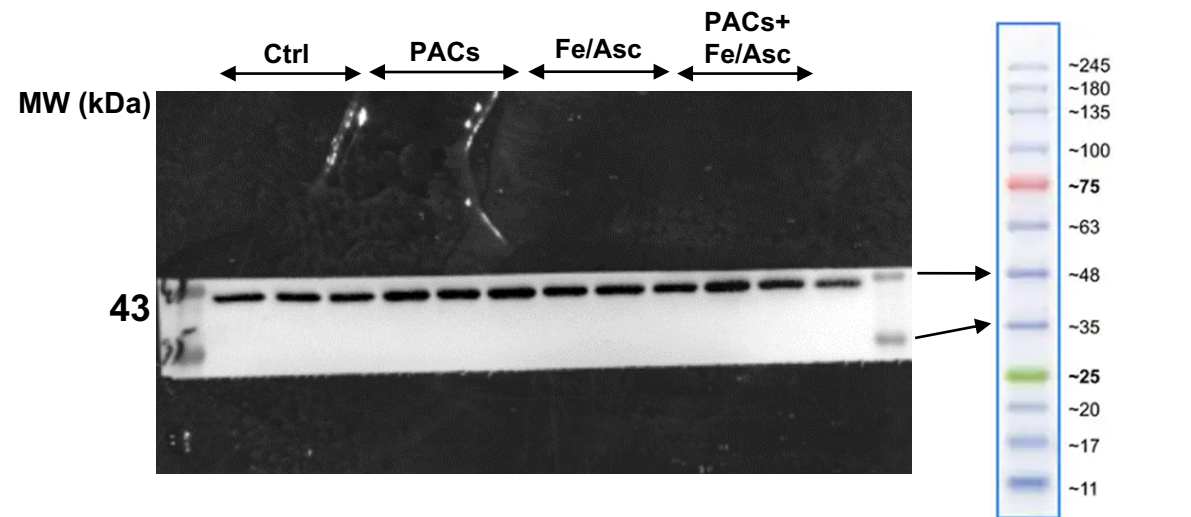

**SOD2**

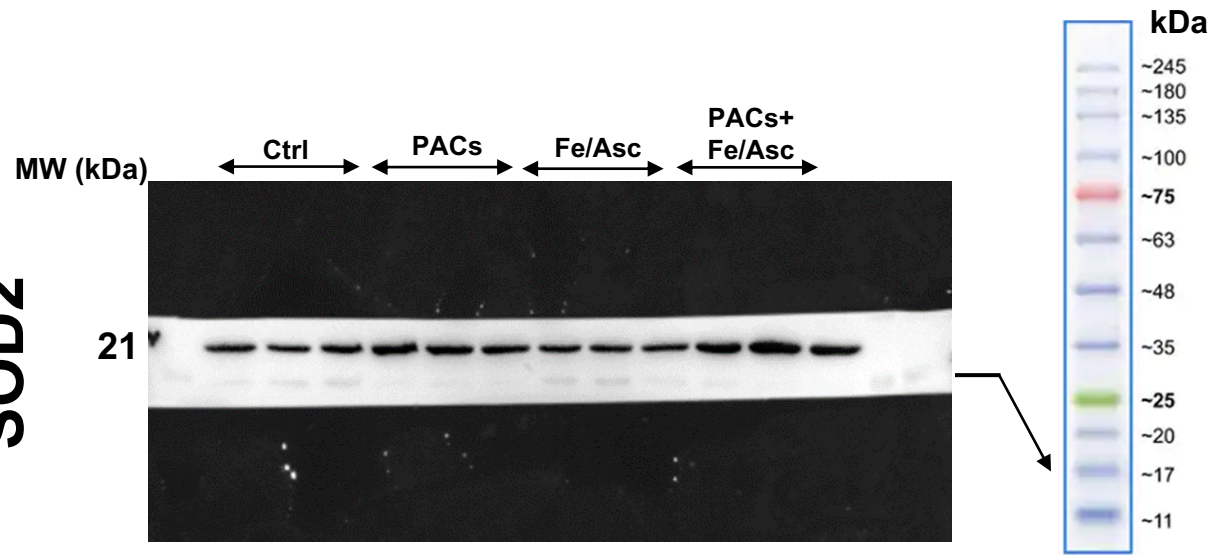

**GPX**

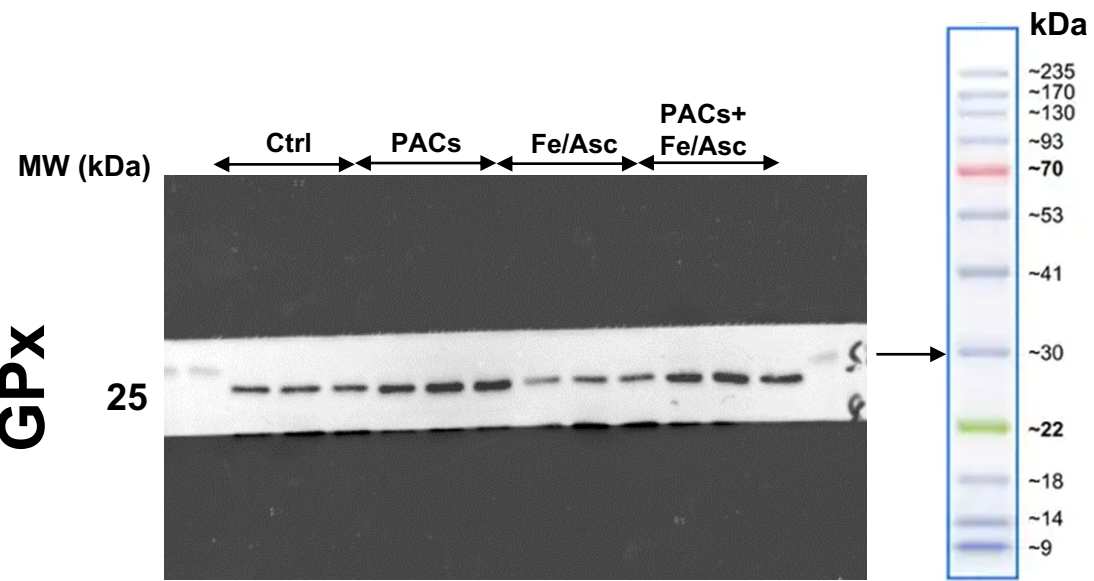

**$\beta$ -actin**

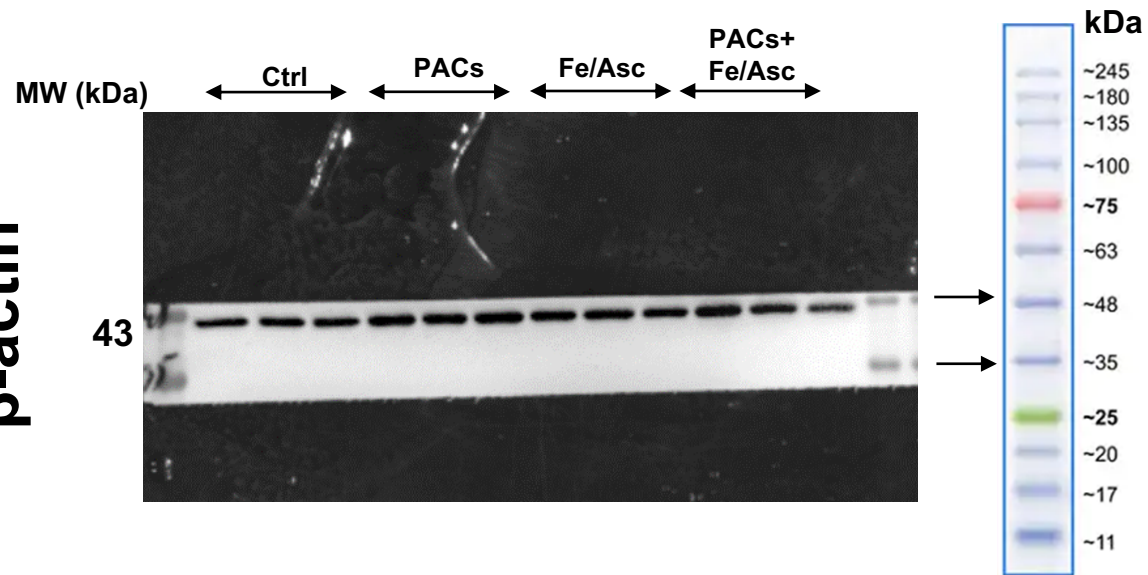

**$\beta$ -actin**

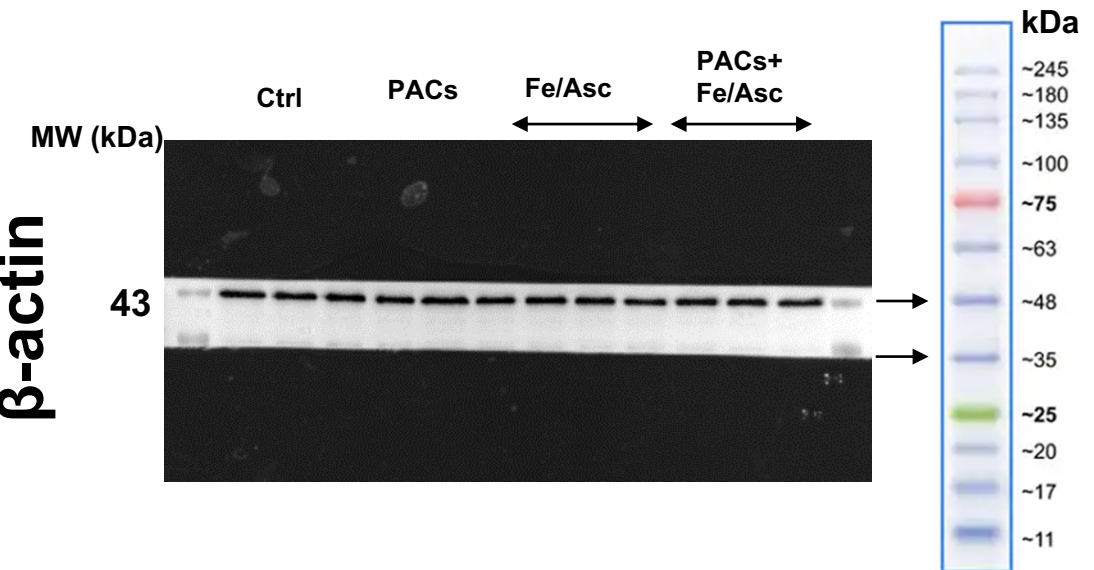



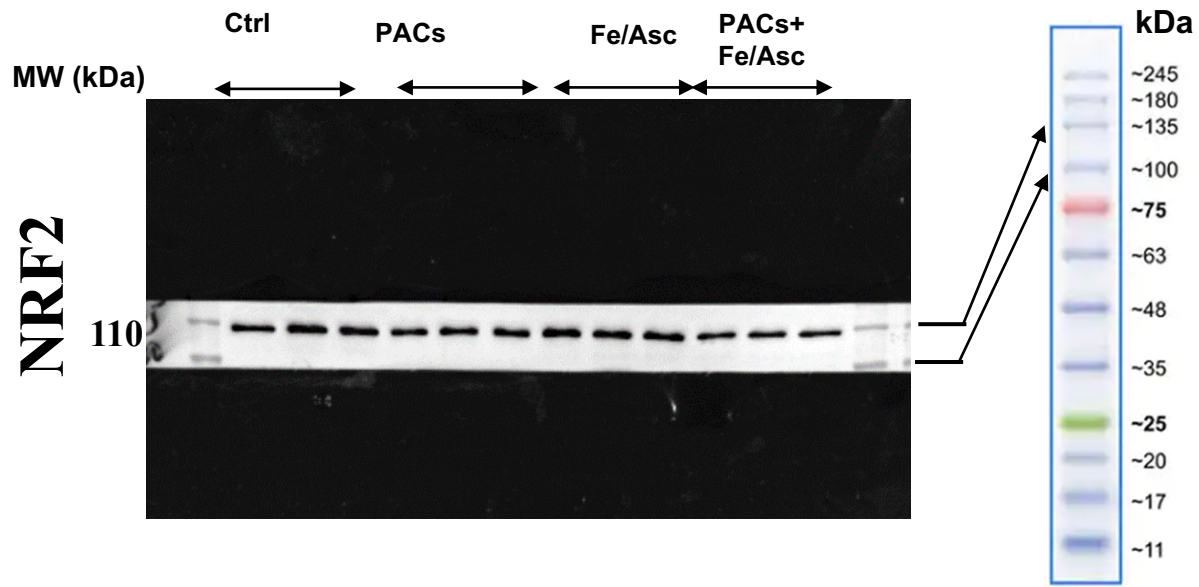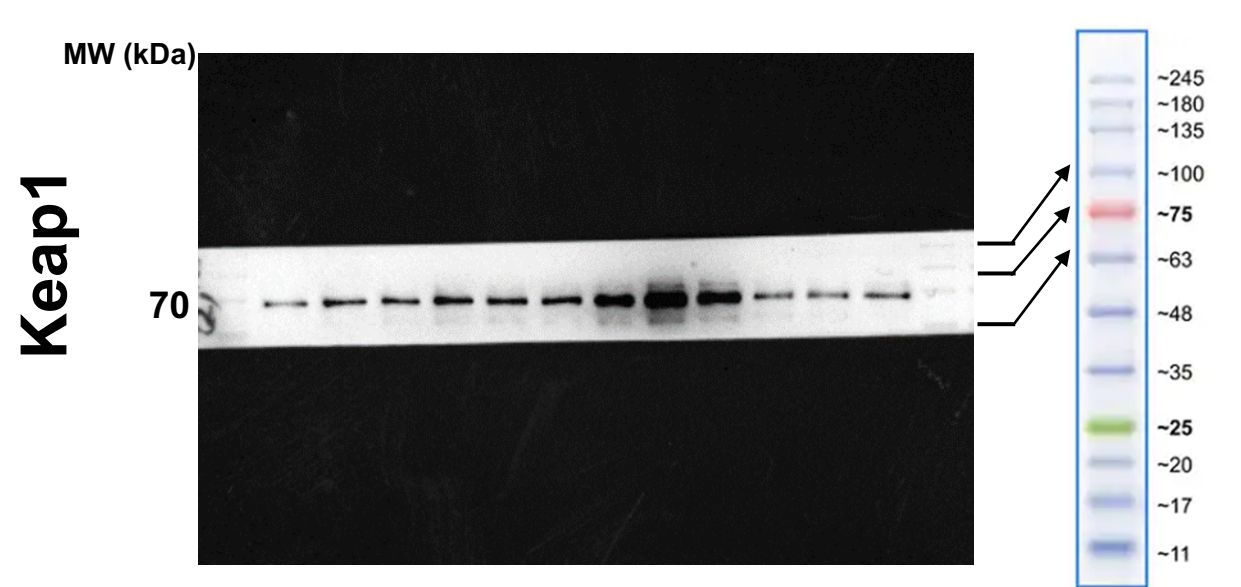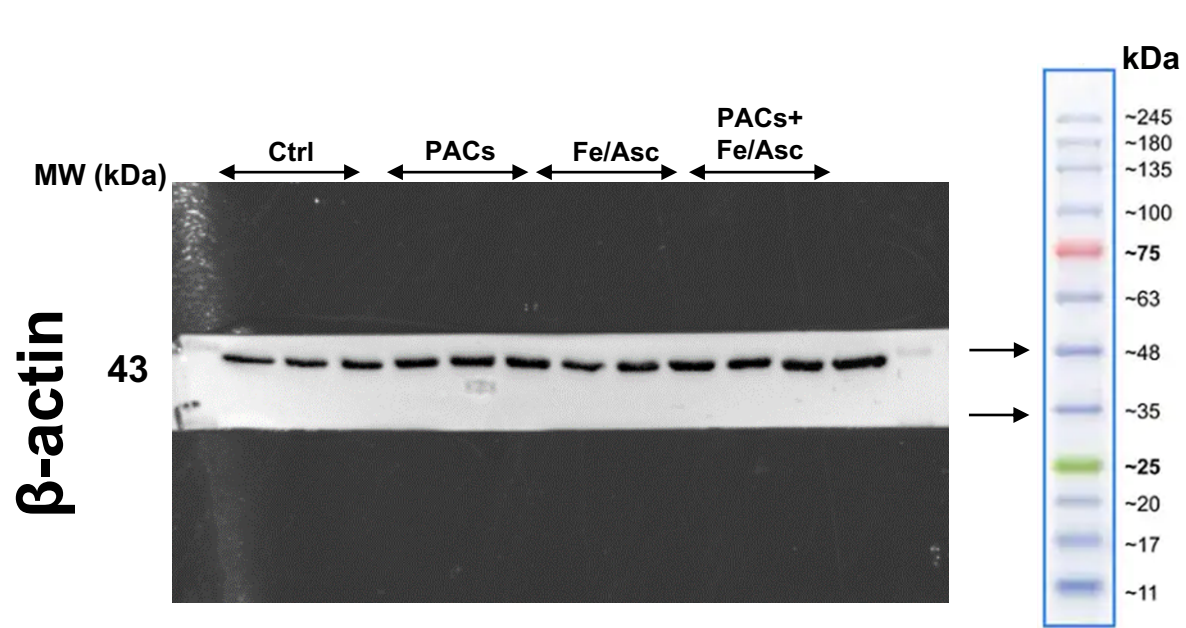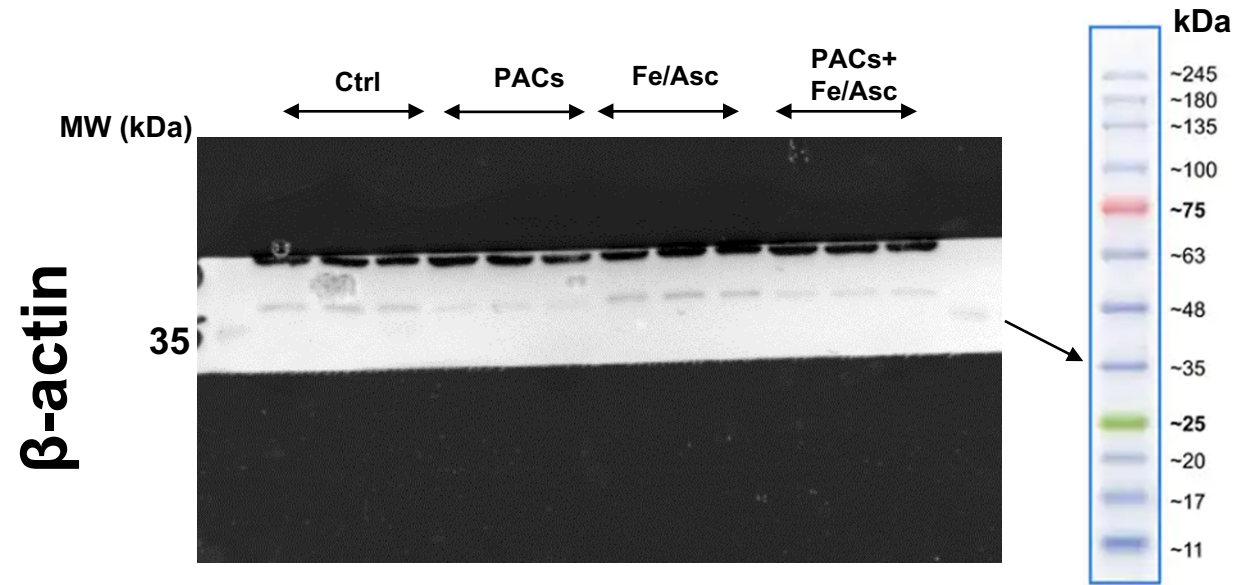

**COX2**

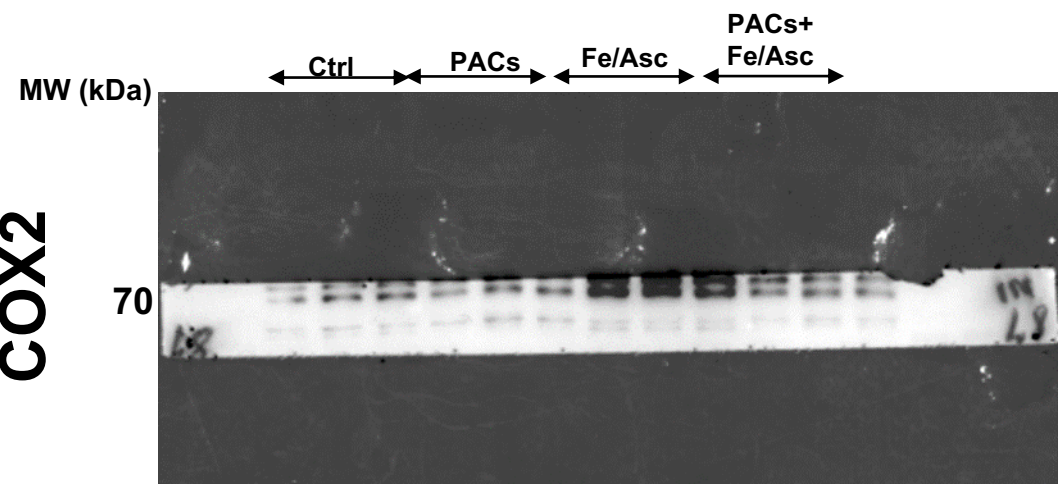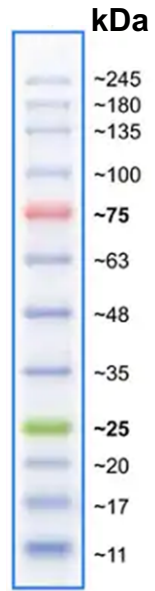

**TNF $\alpha$**

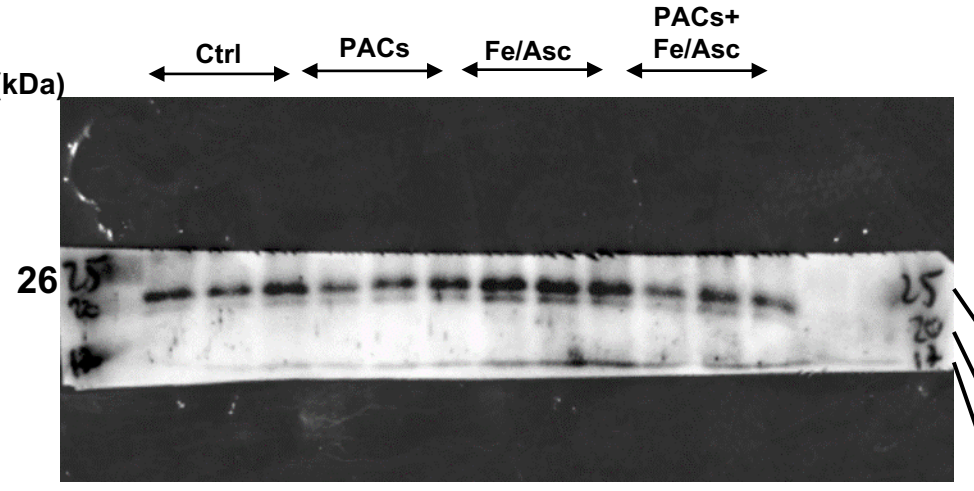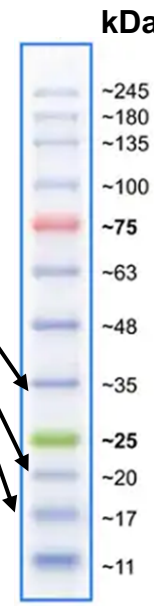

**$\beta$ -actin**

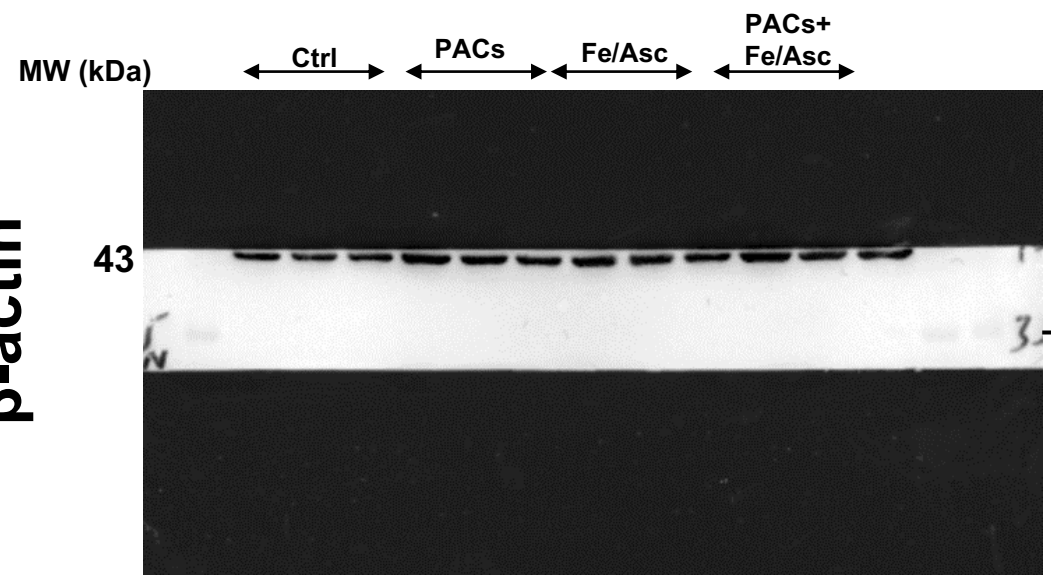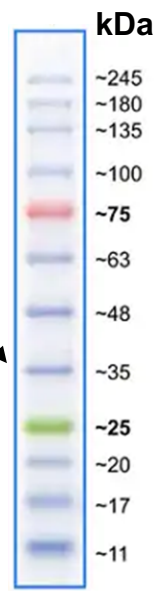

**$\beta$ -actin**

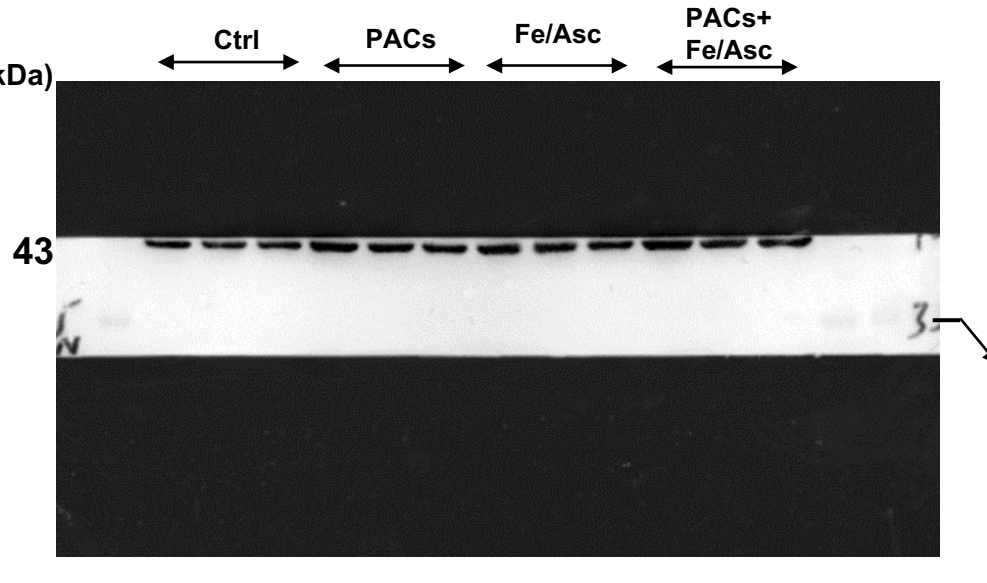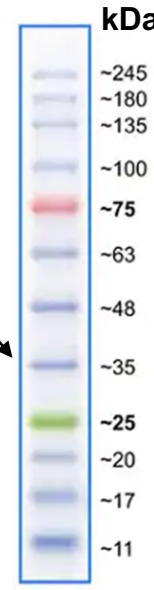



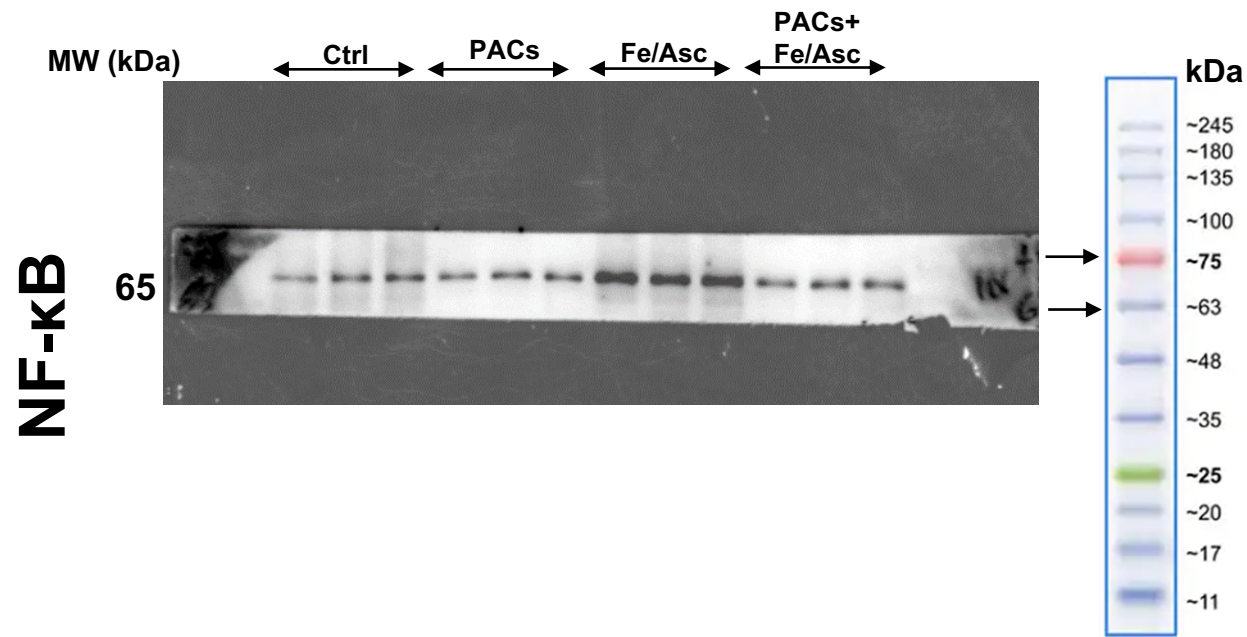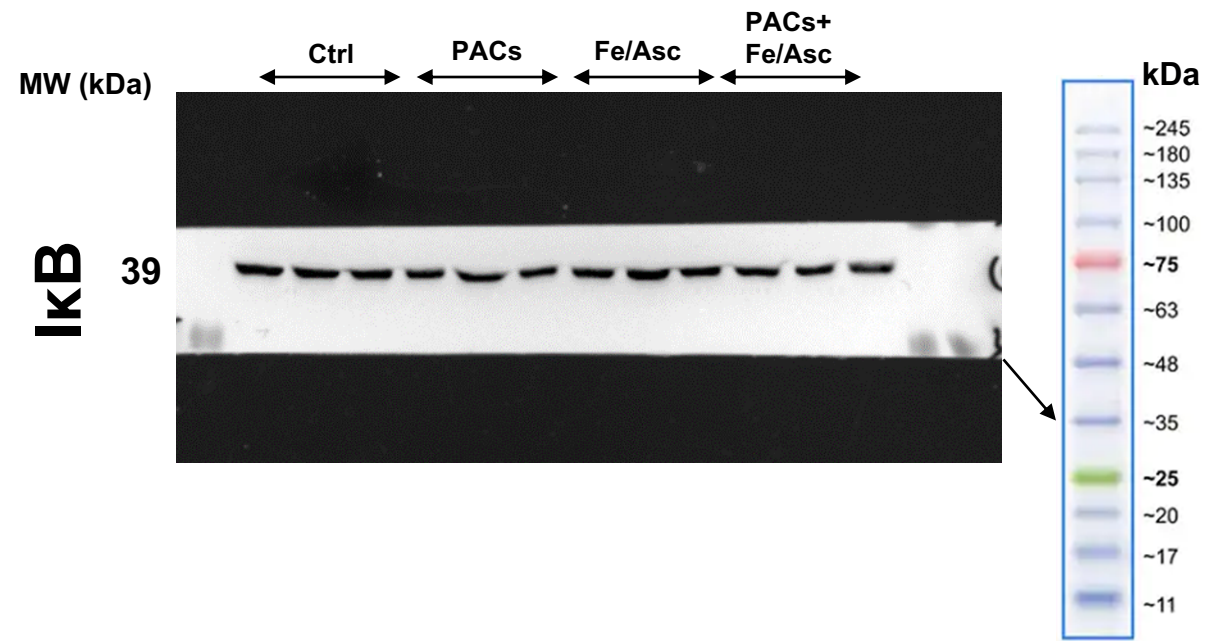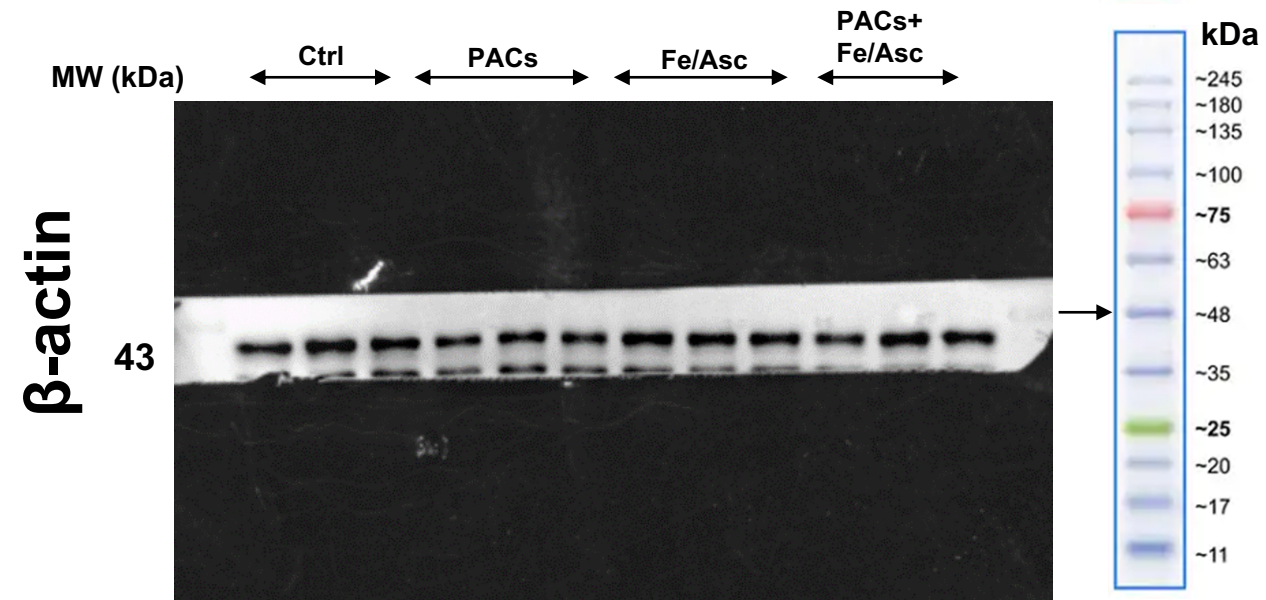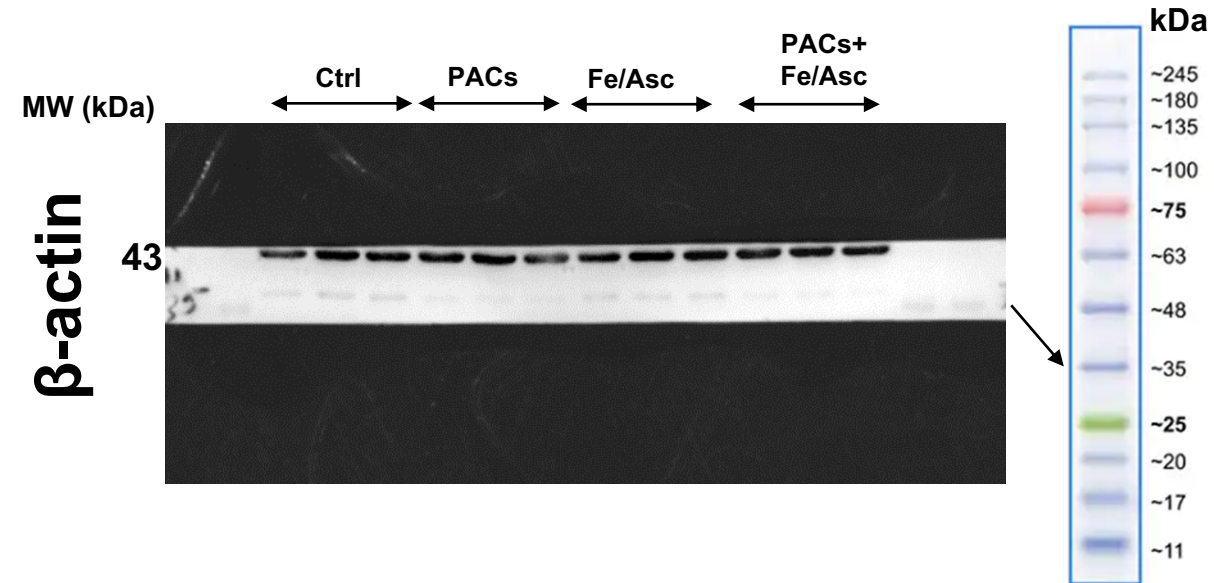

pIkB

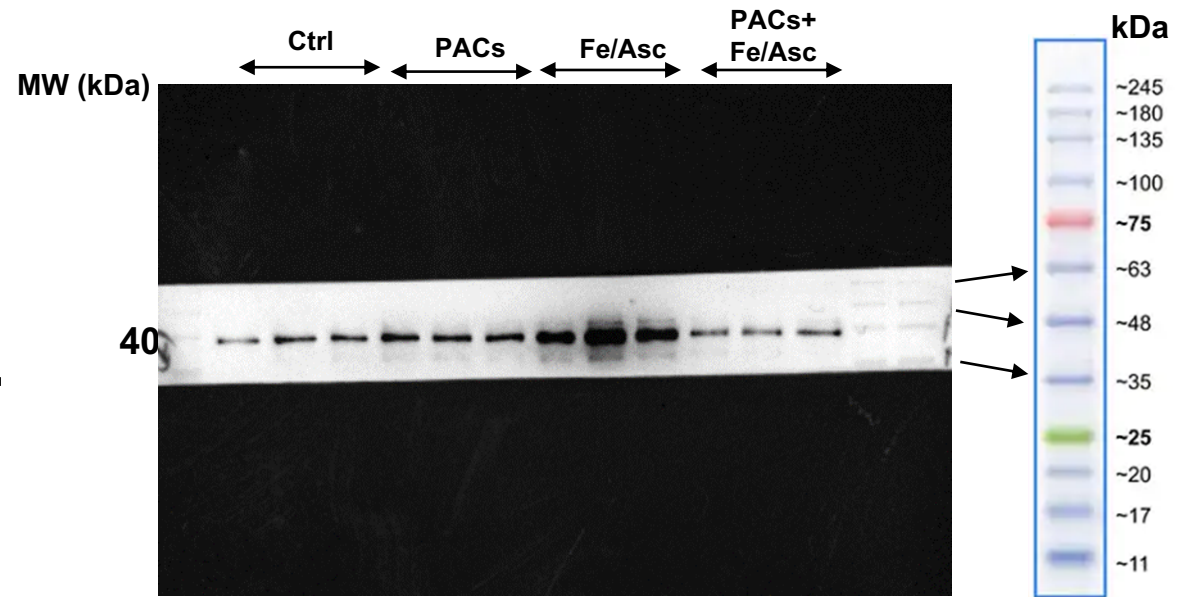

$\beta$ -actin

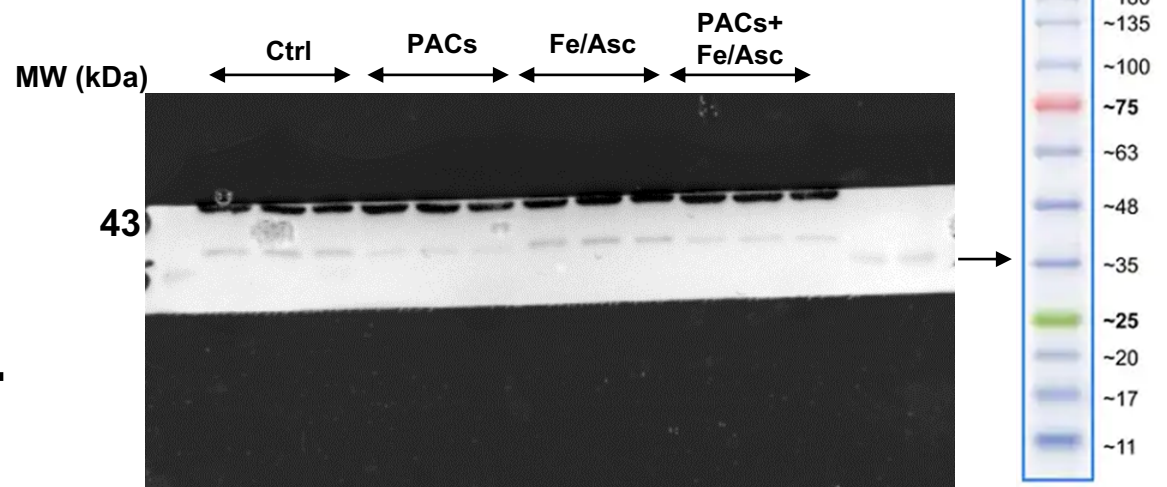



**CPT1 $\alpha$**

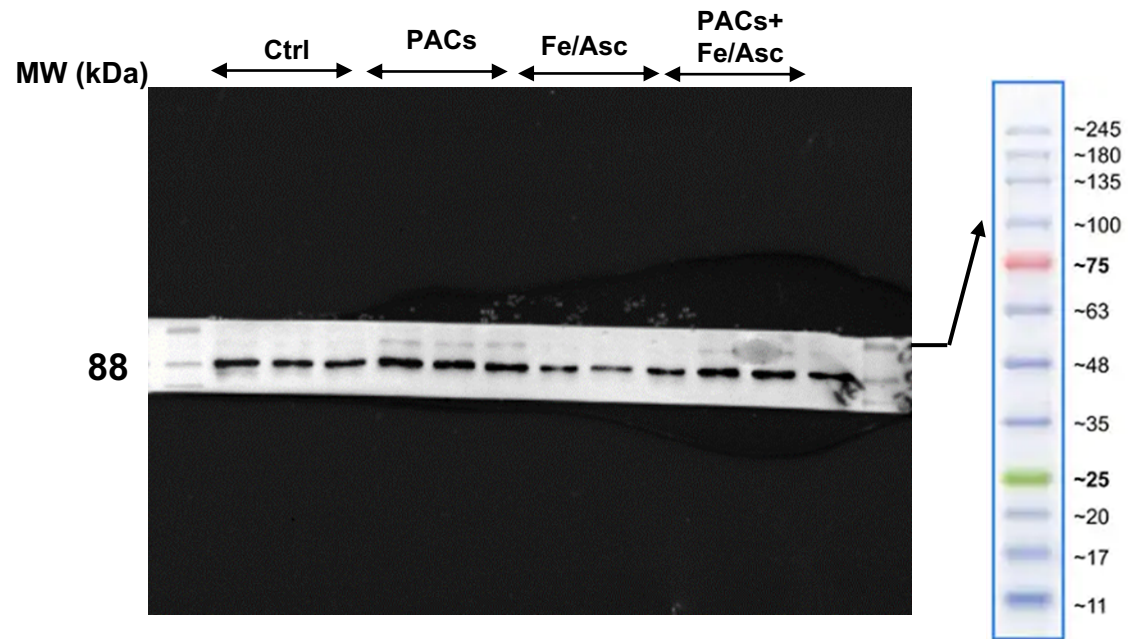

**PPAR $\alpha$**

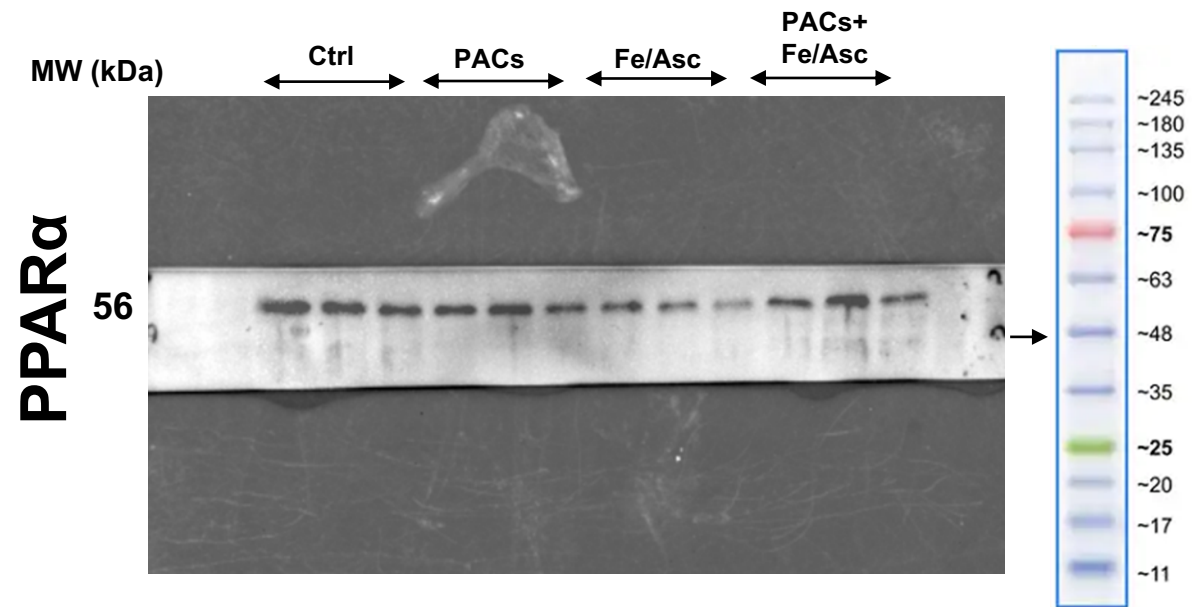

**$\beta$ -actin**

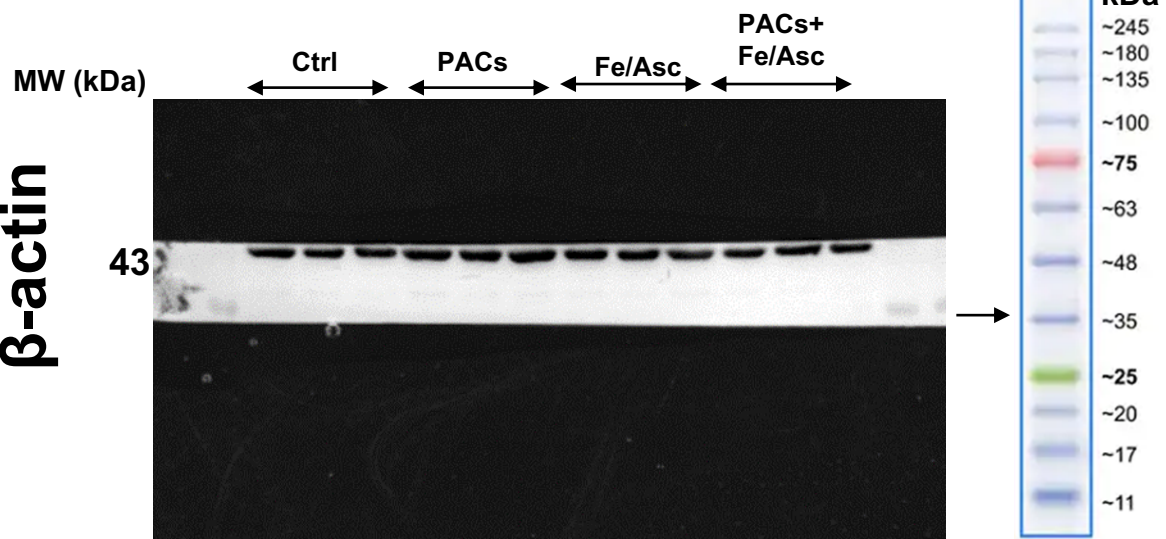

**$\beta$ -actin**

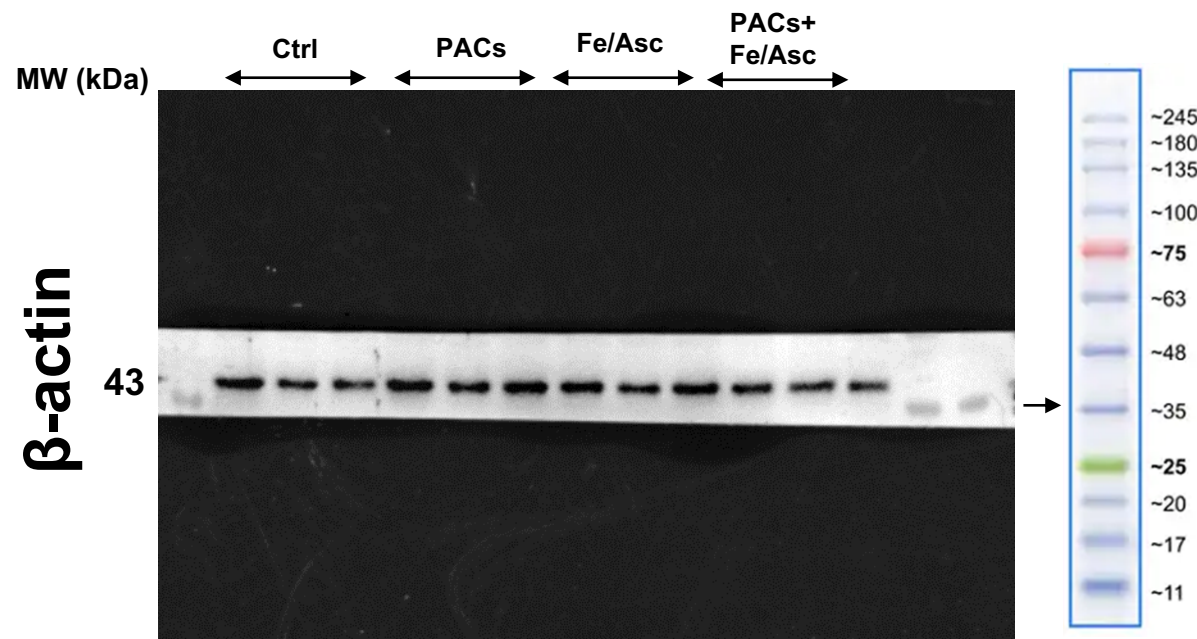



**PGC1 $\alpha$**

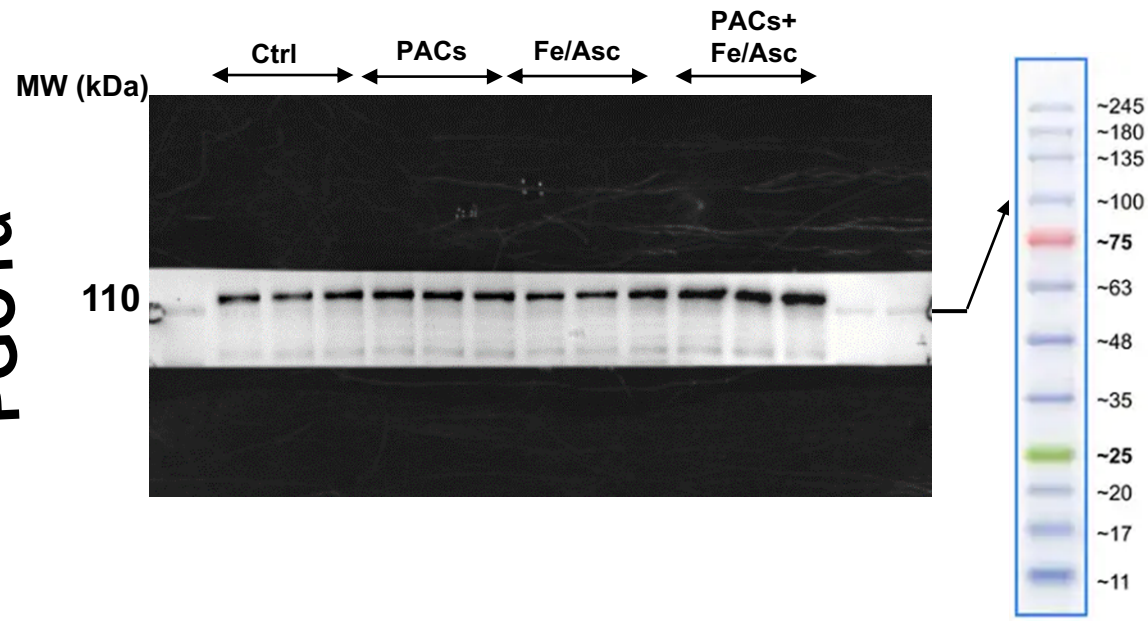

**$\beta$ -actin**

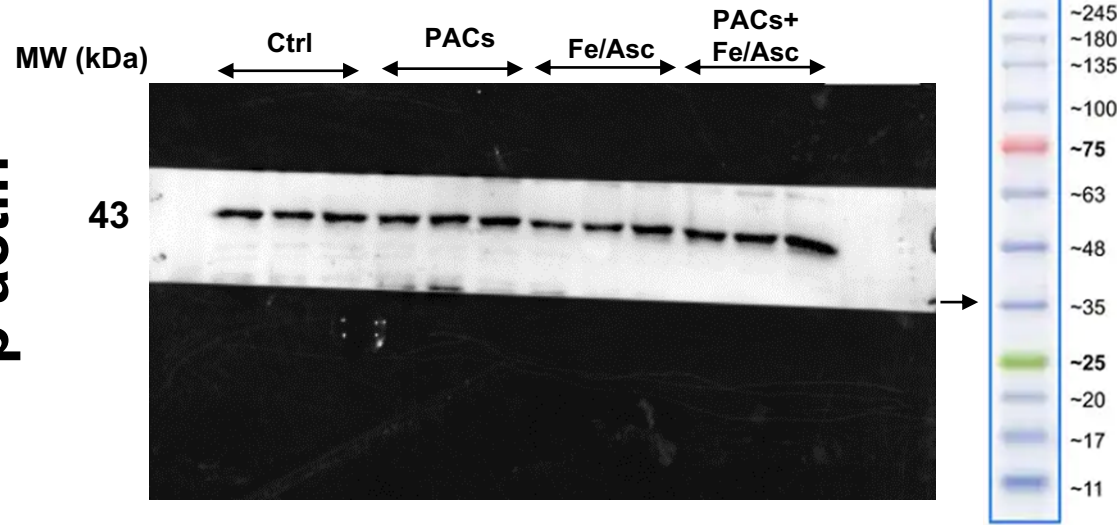

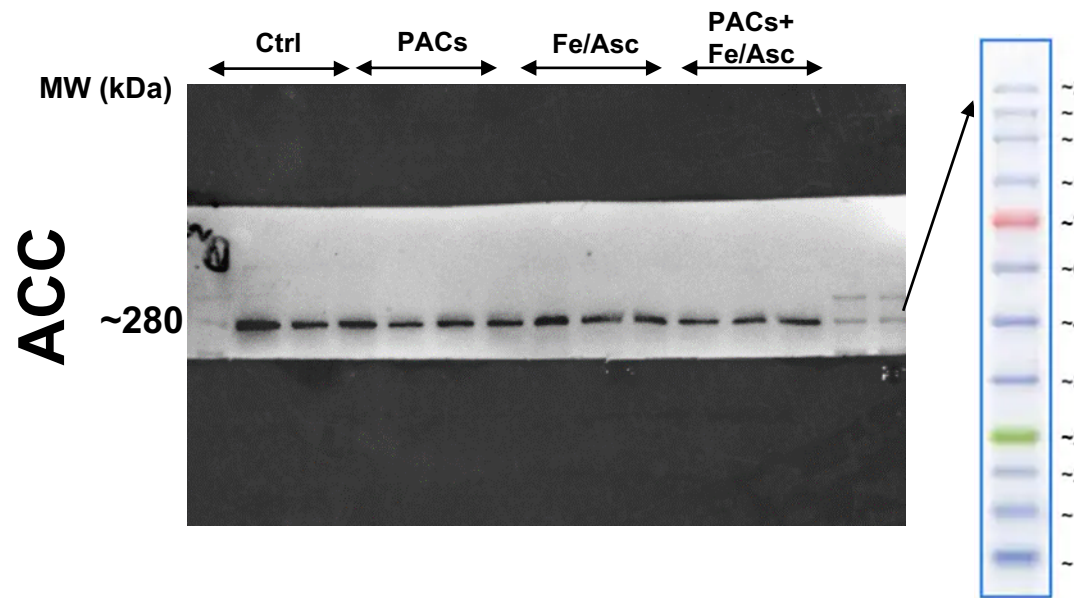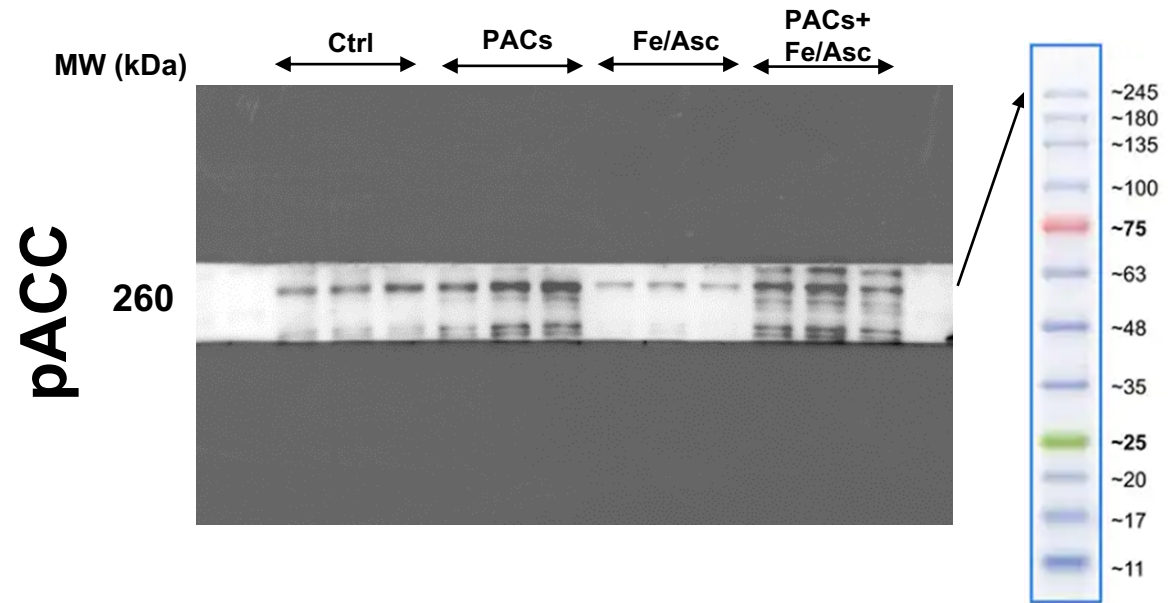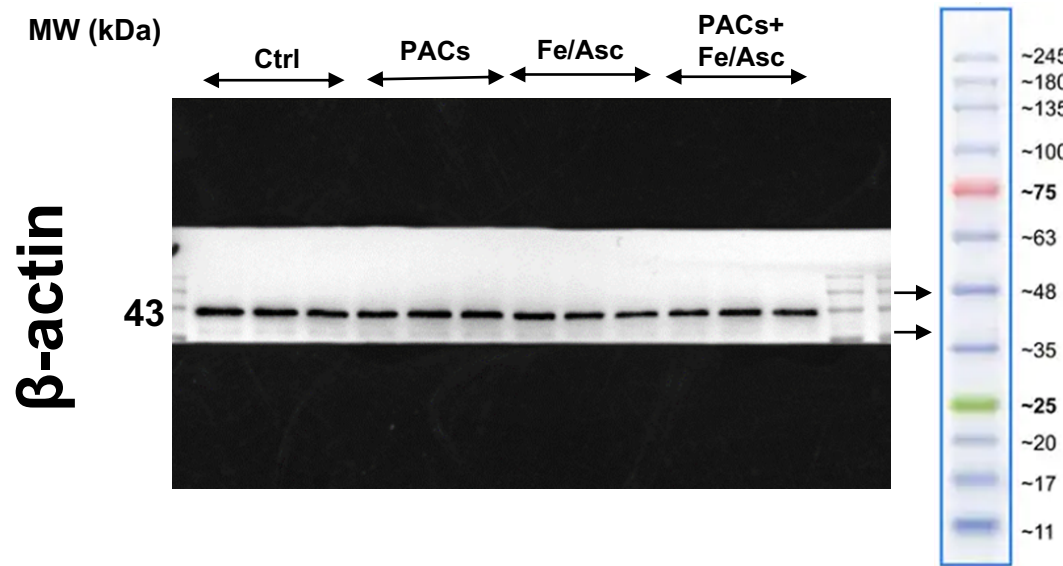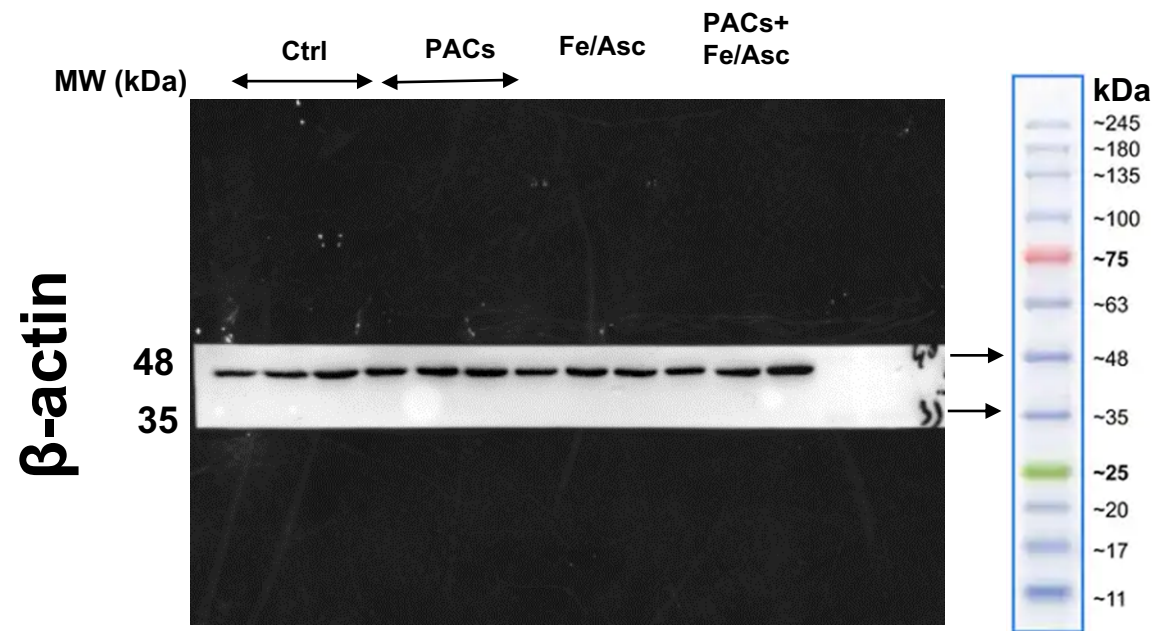



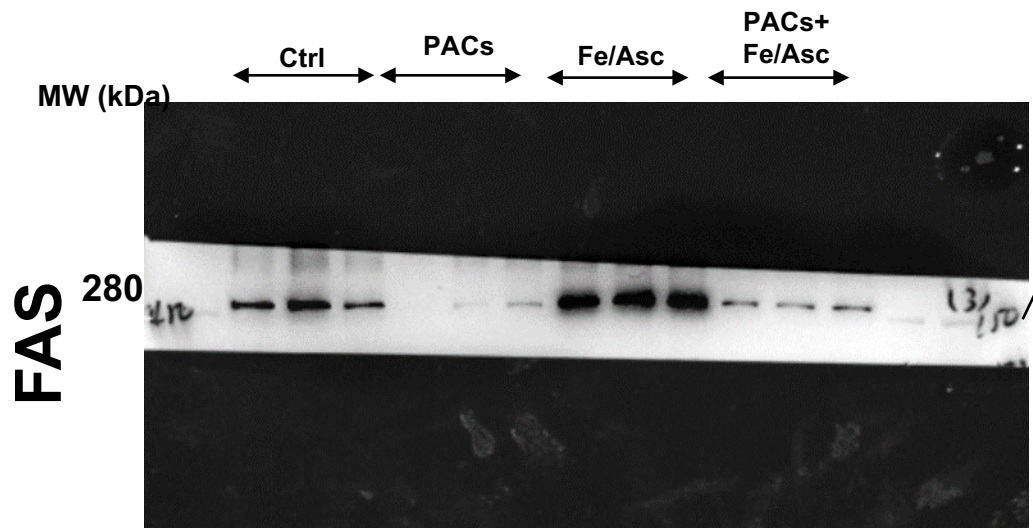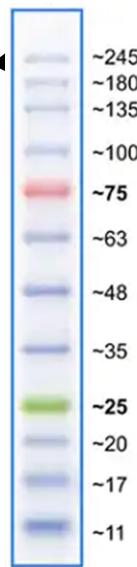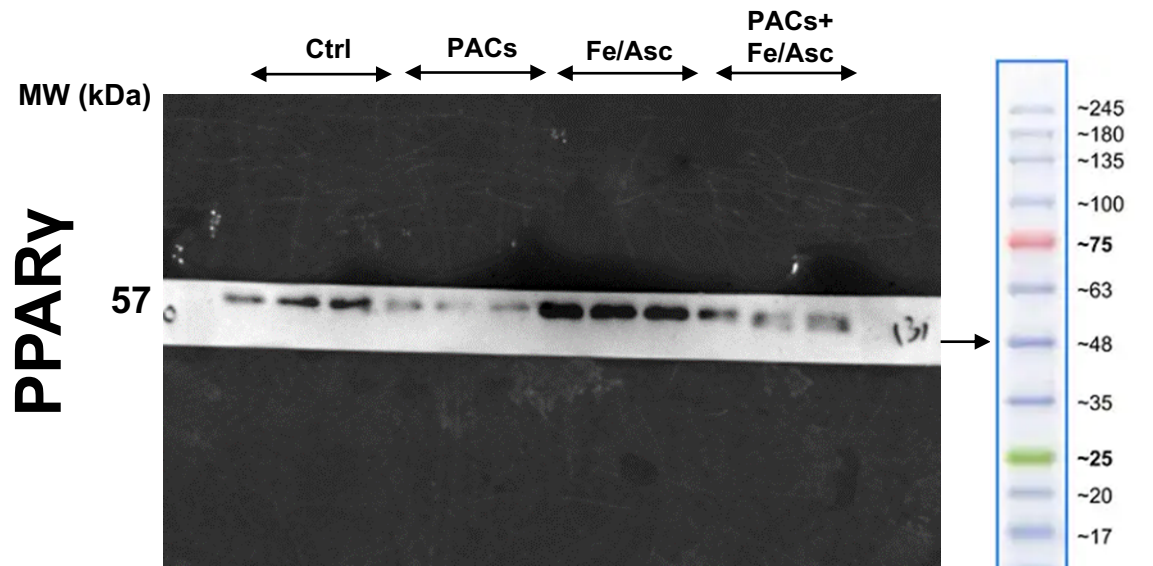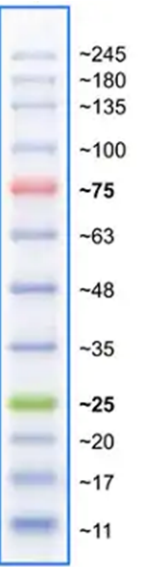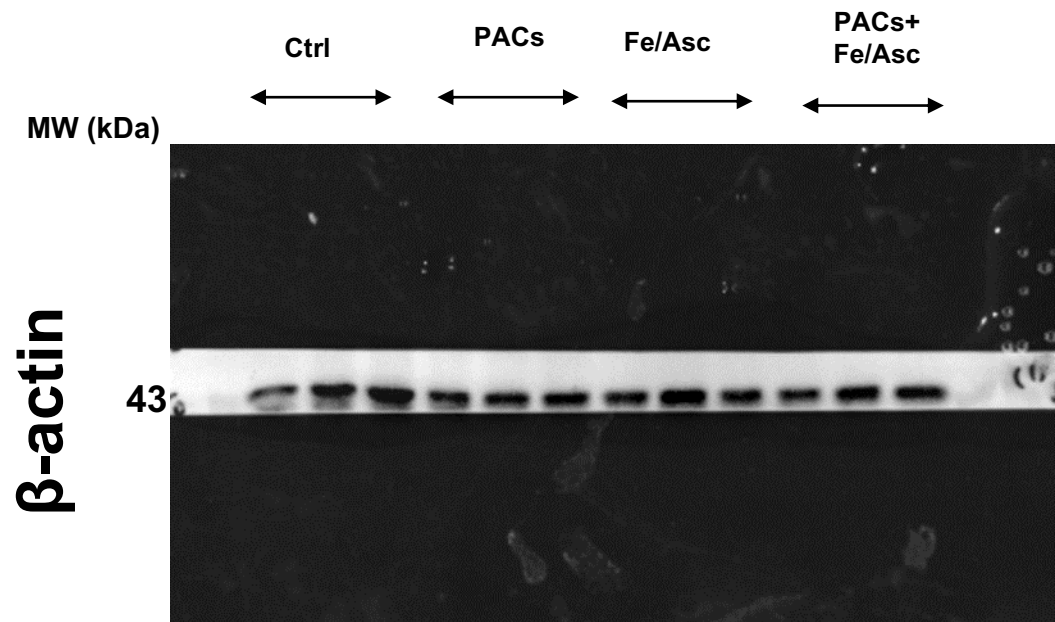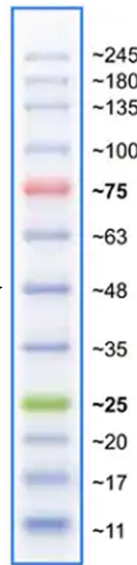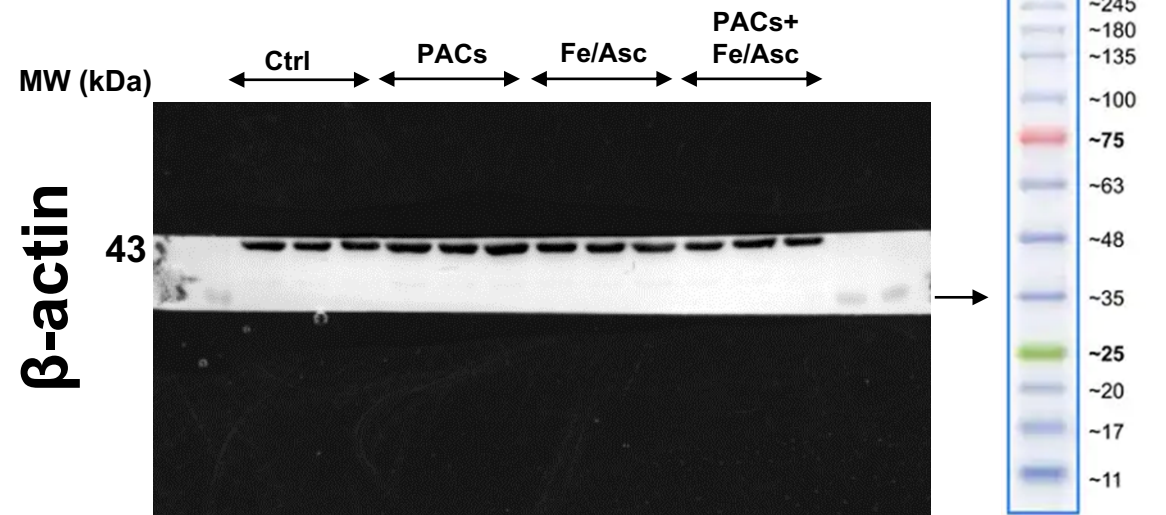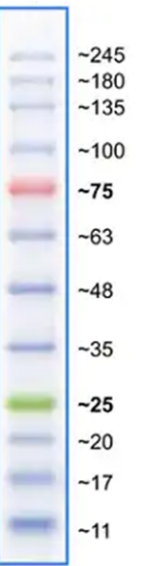

**SREBP-C1**

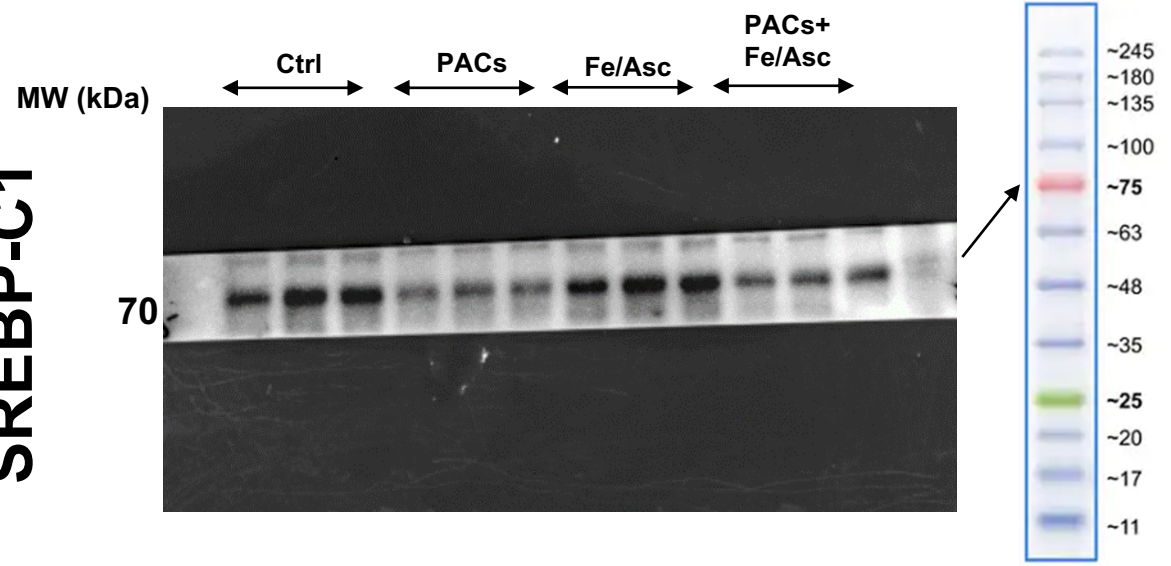

**$\beta$ -actin**

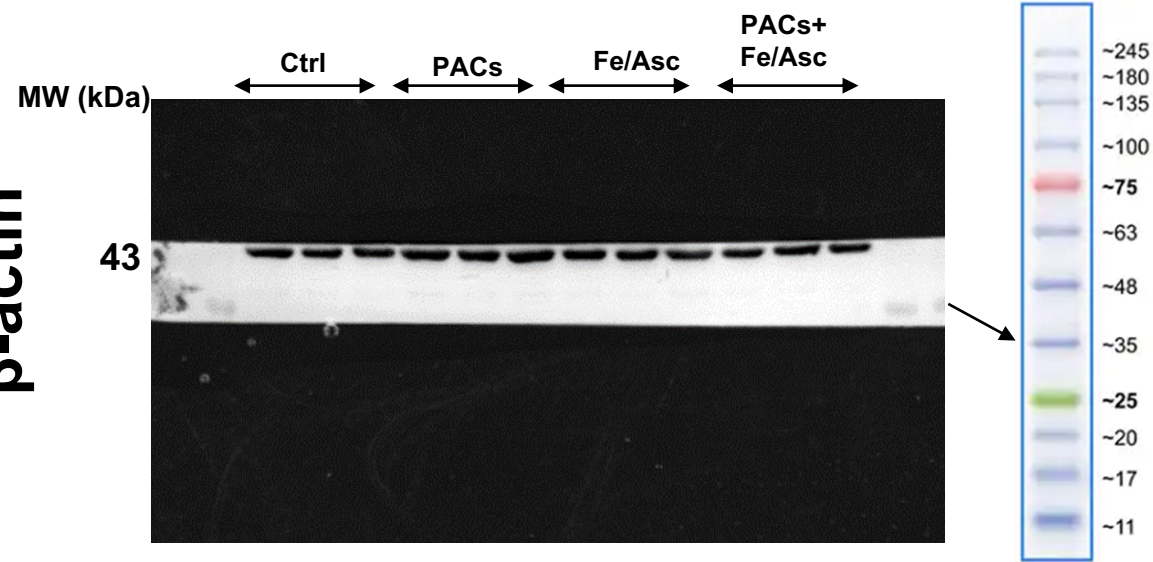



**AMPK $\alpha$**

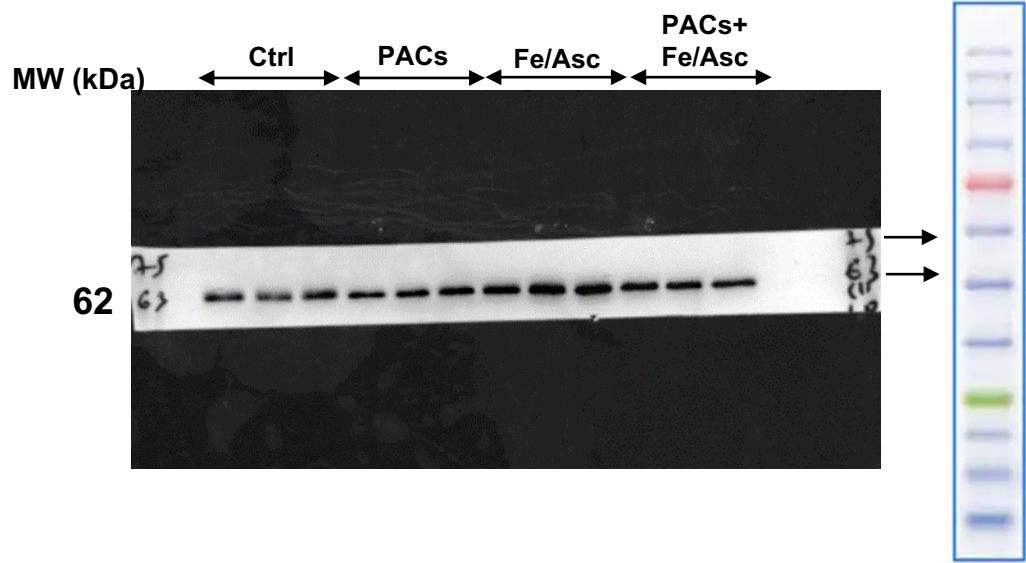

**pAMPK $\alpha$**

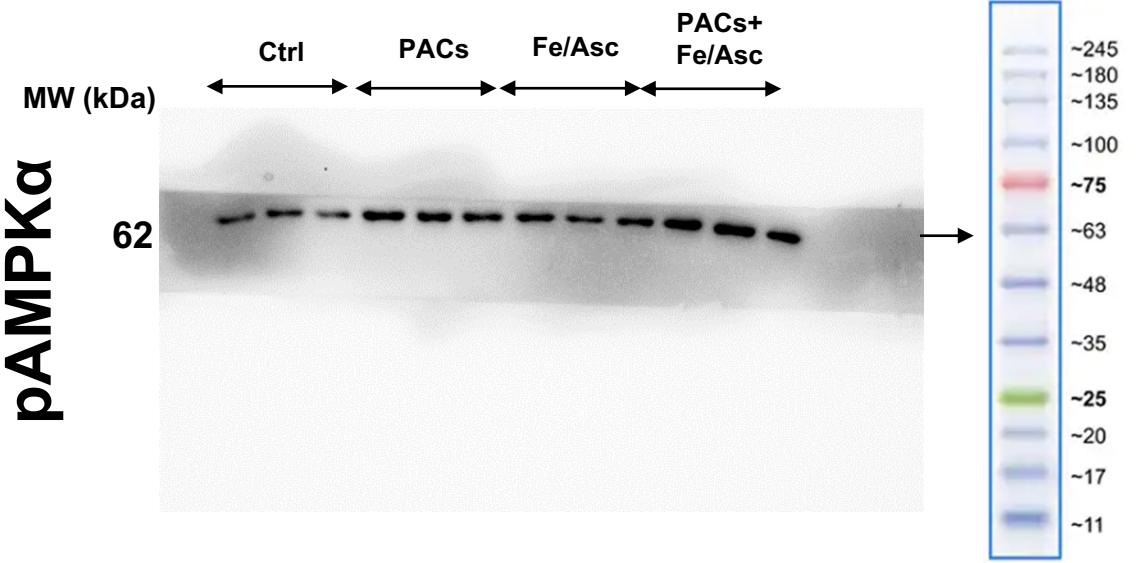

**$\beta$ -actin**

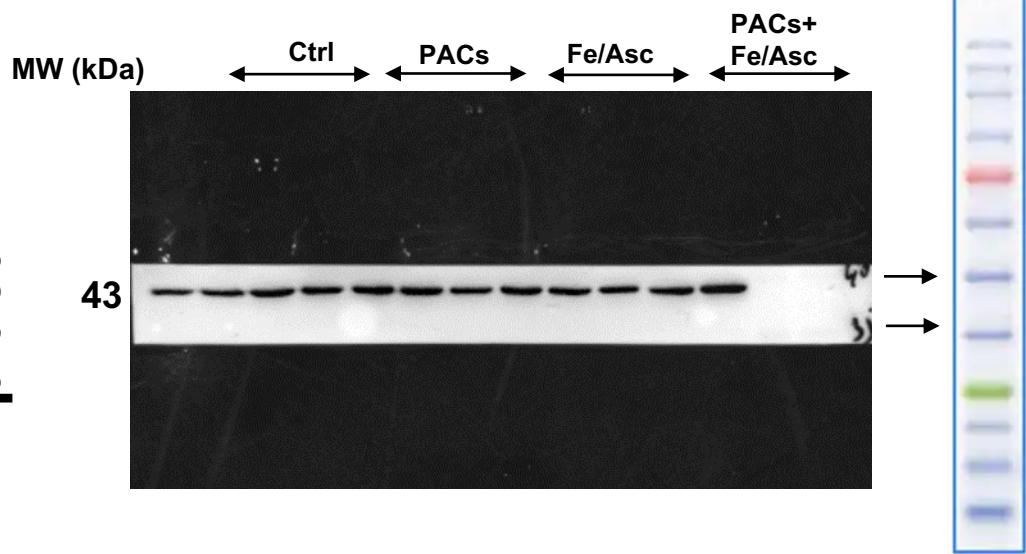

**$\beta$ -actin**

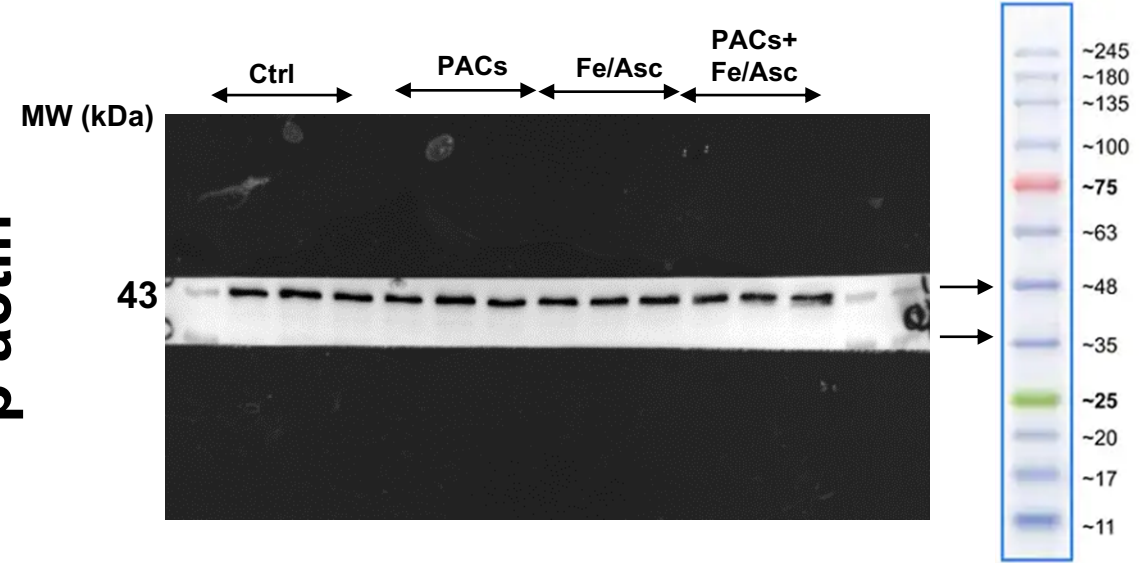

# P38-MAPK

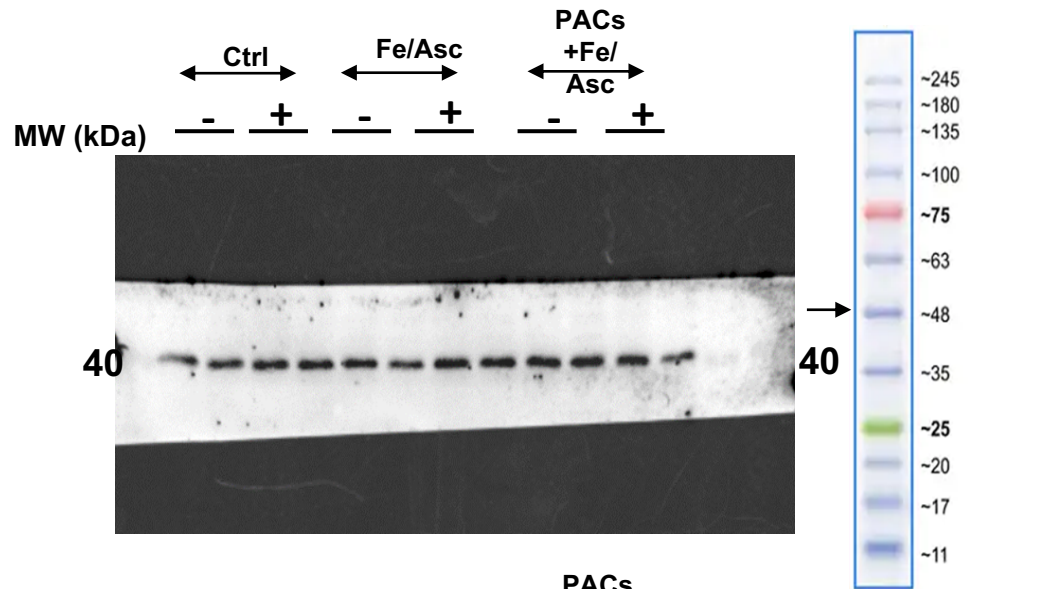

# β-actin

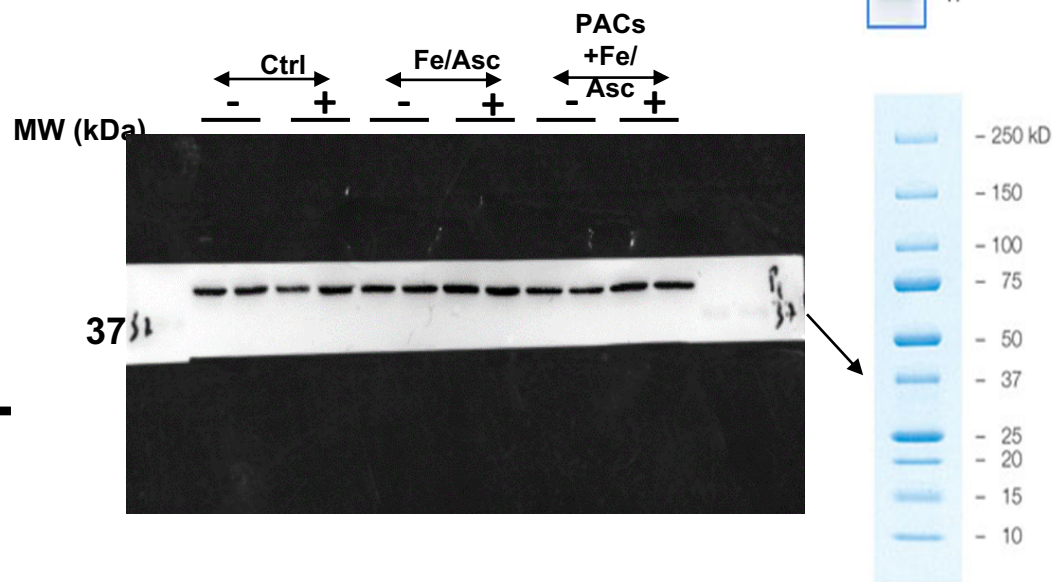

# pP38-MAPK

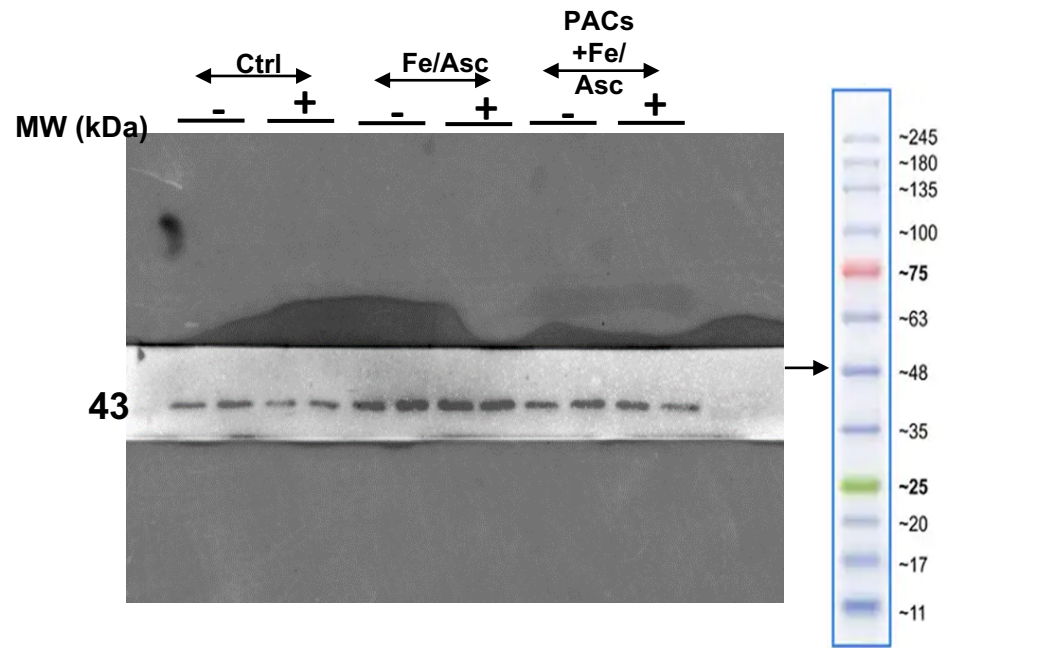

# β-actin

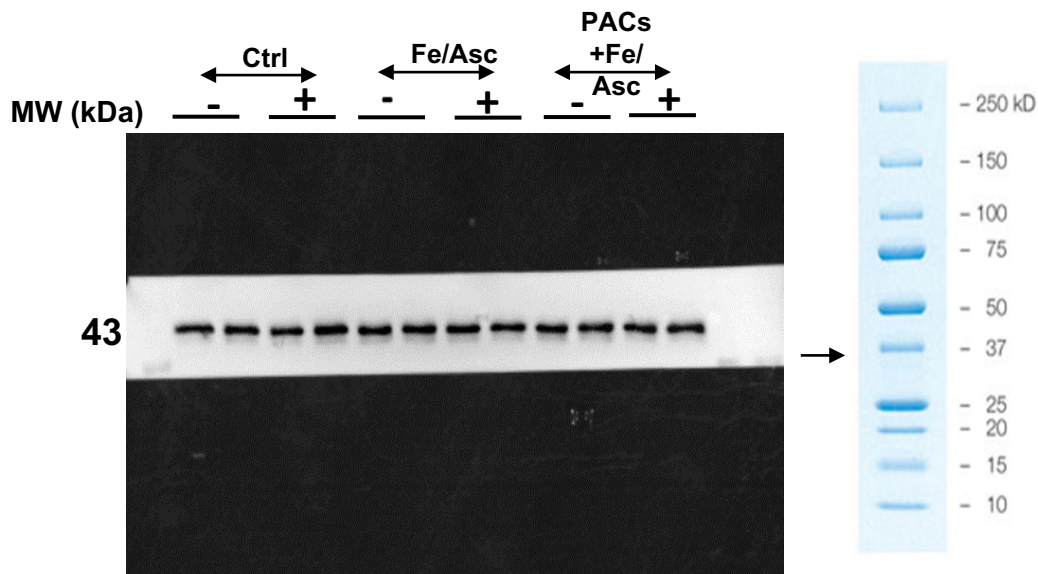



**AKT**

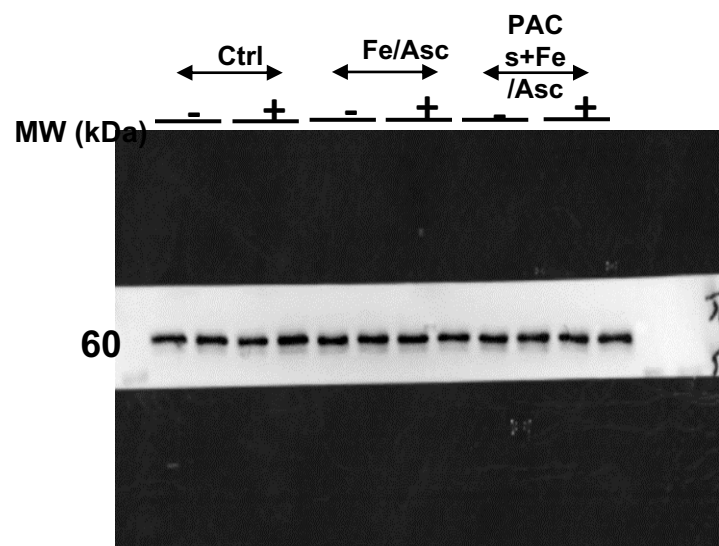

**pAKT**

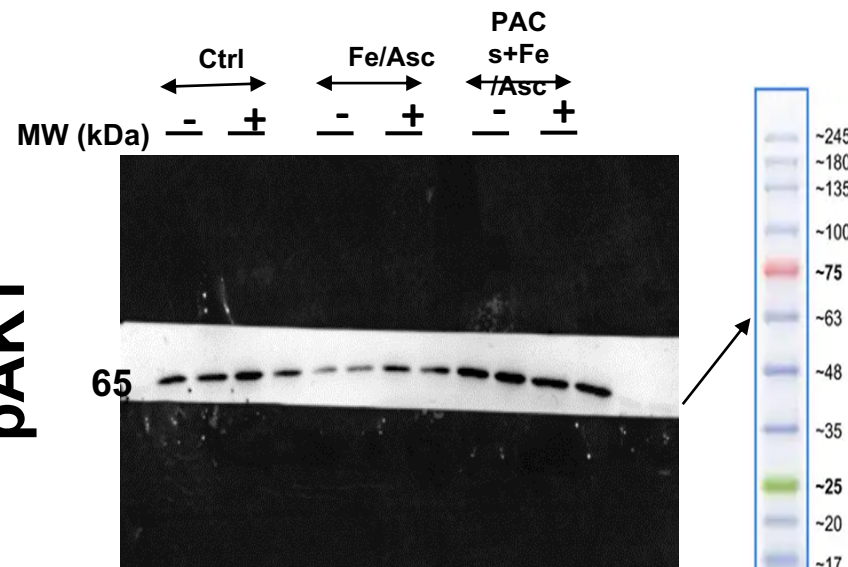

**$\beta$ -actin**

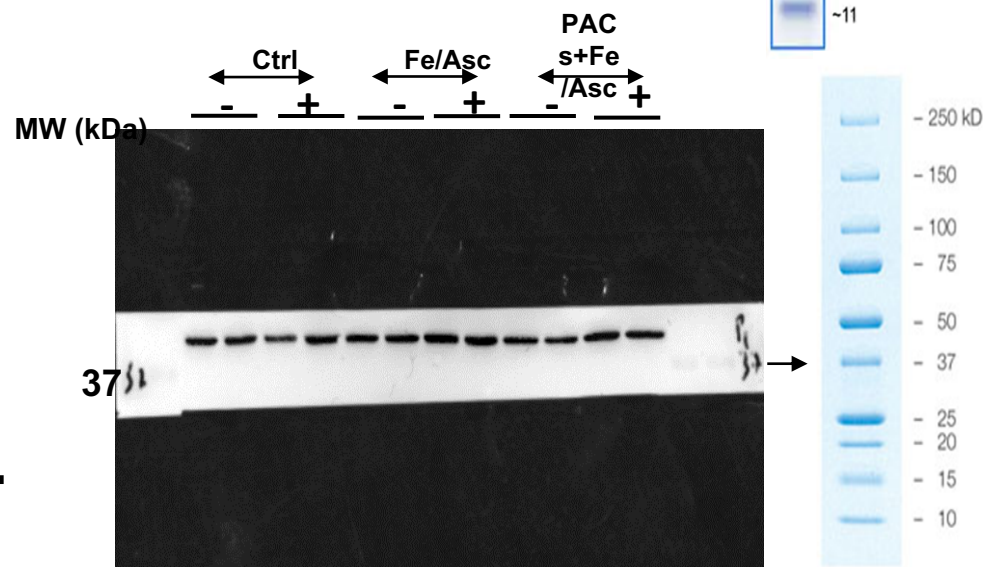

**$\beta$ -actin**

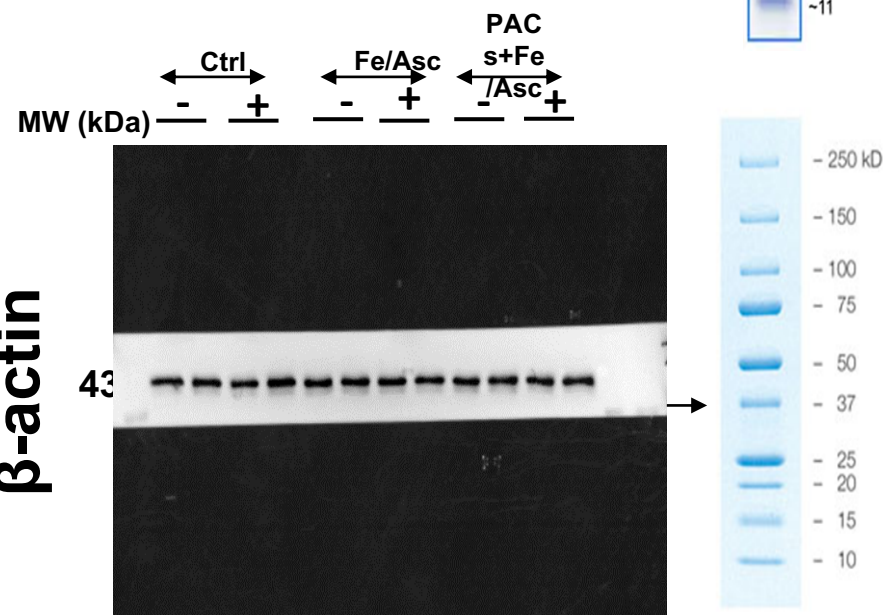

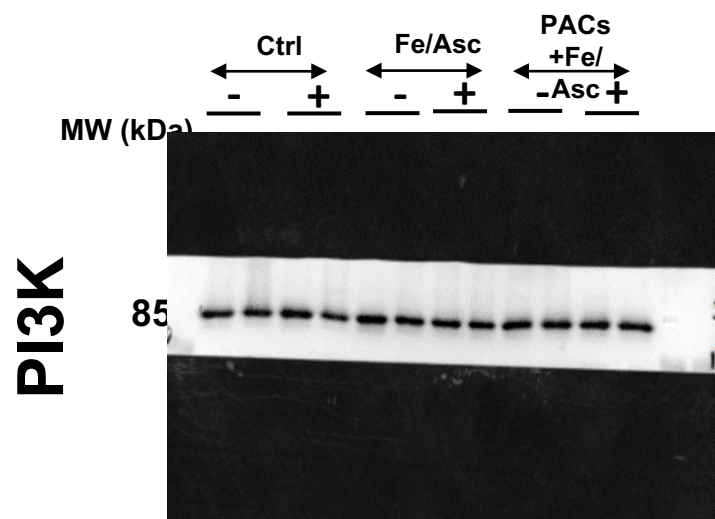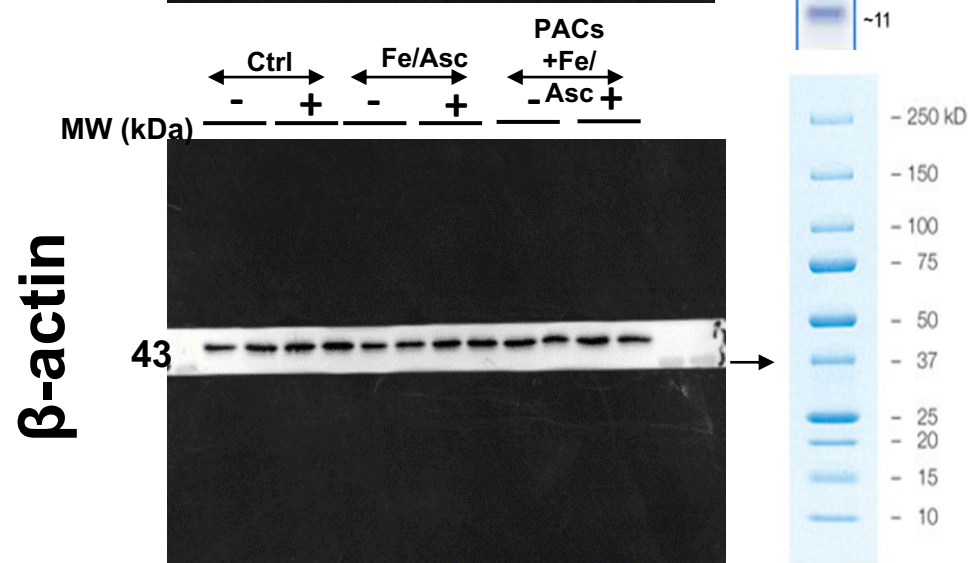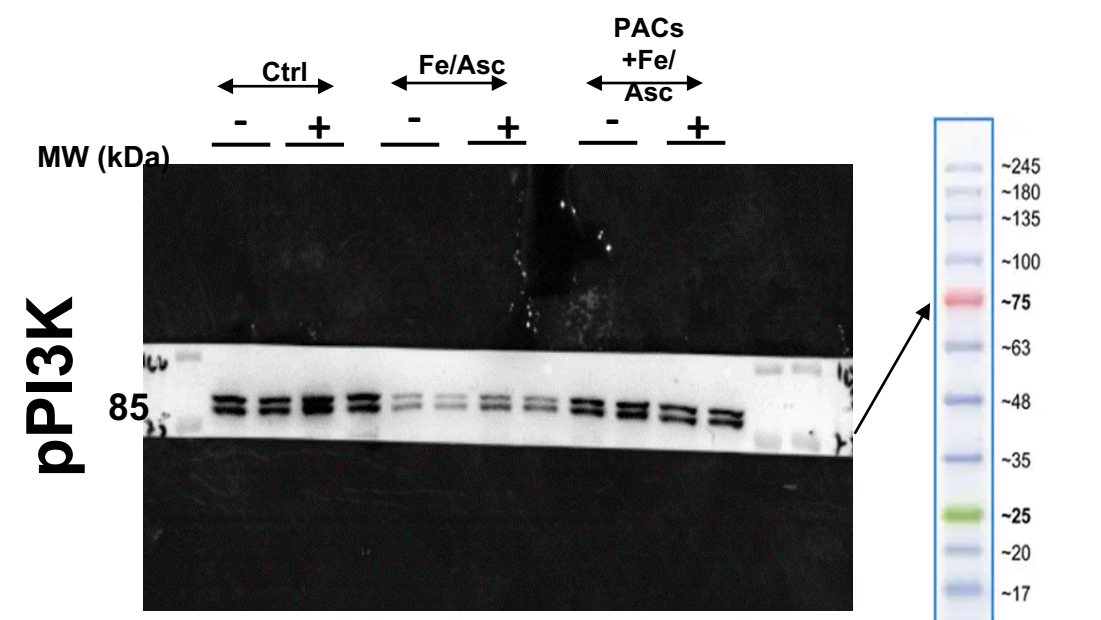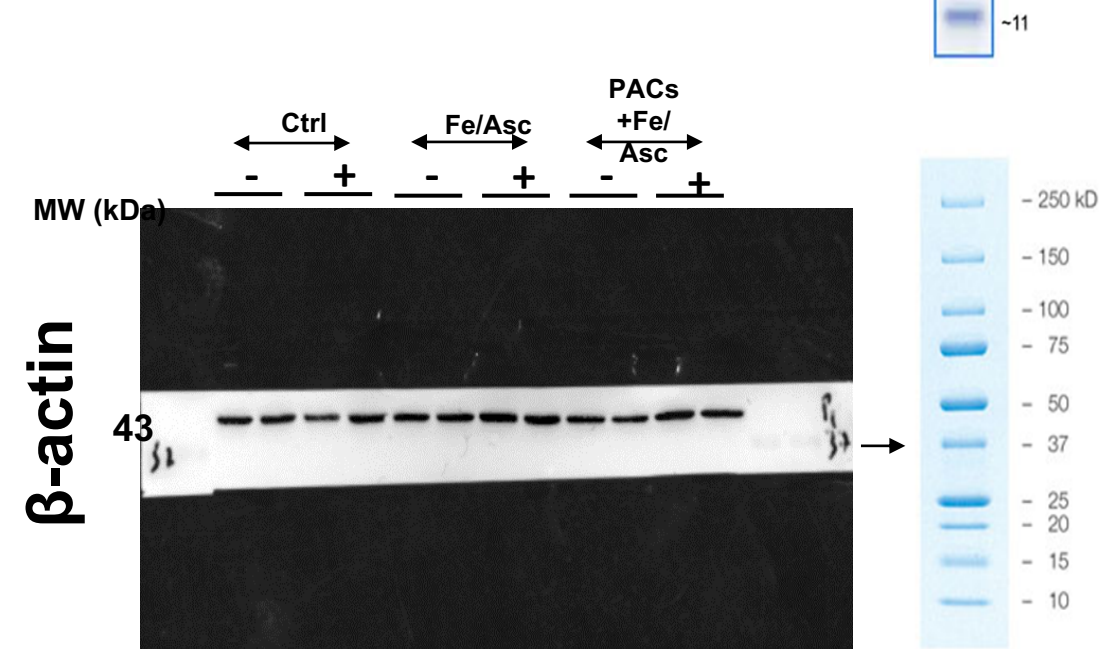



**G6Pase**

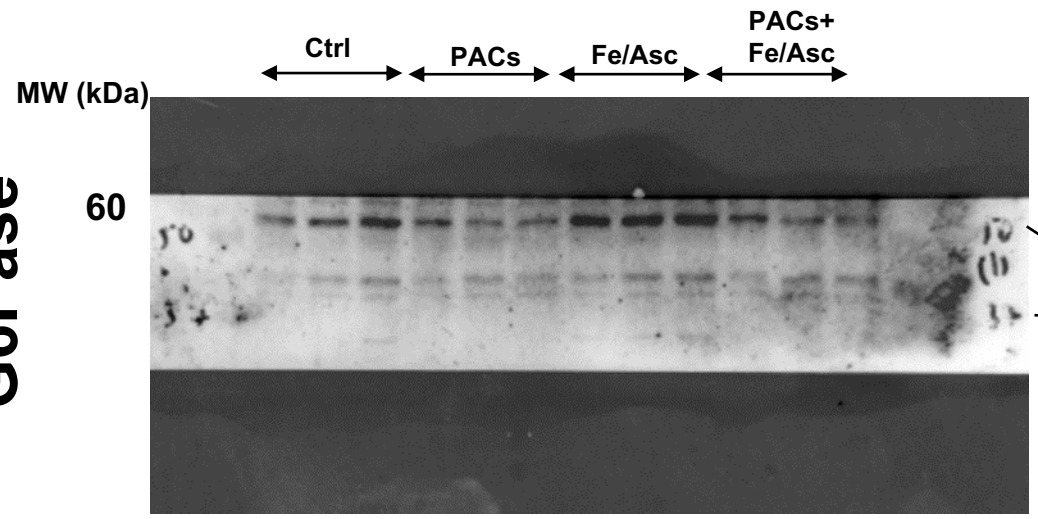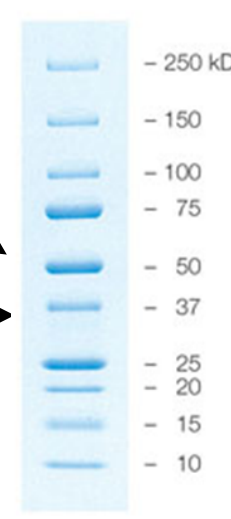

**PEPCK**

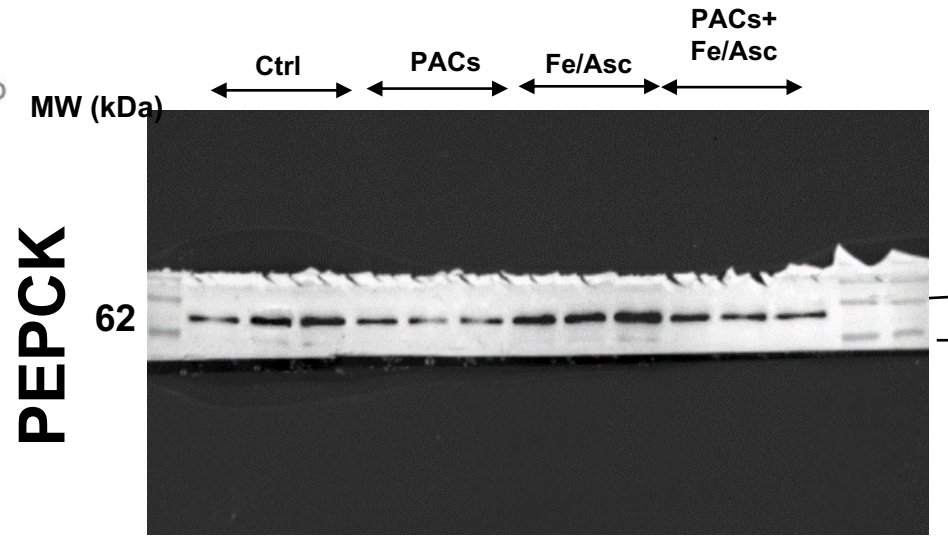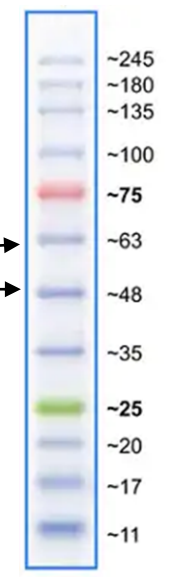

**$\beta$ -actin**

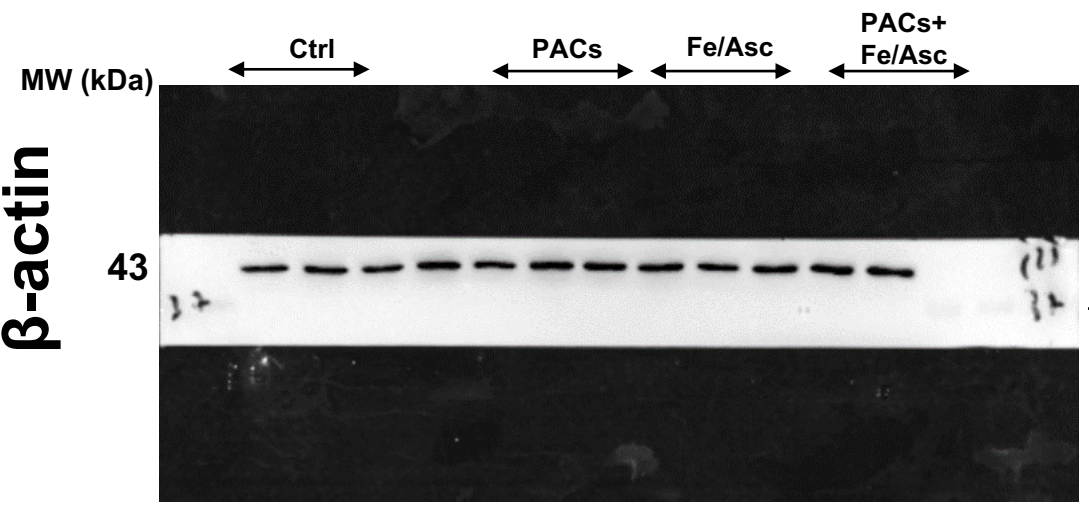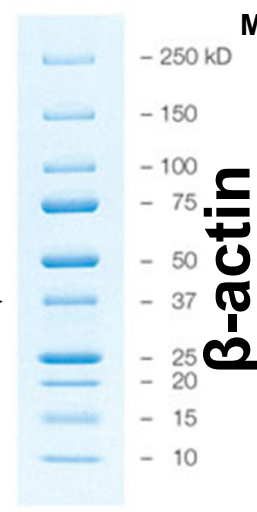

**$\beta$ -actin**

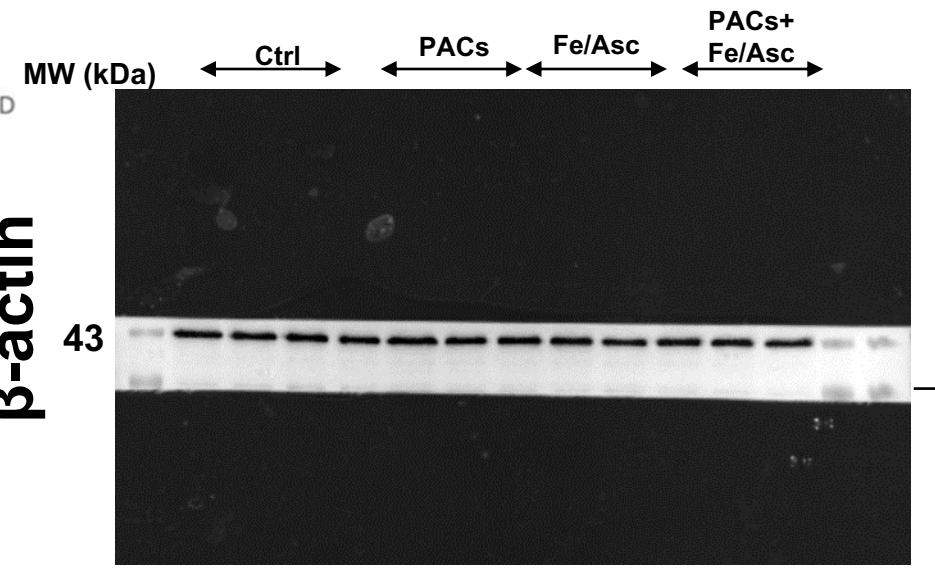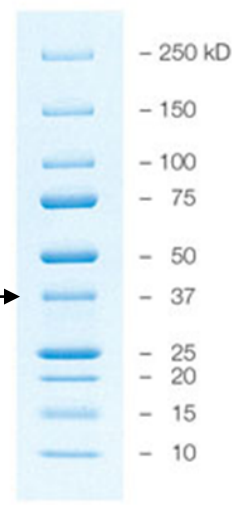

Supplement: 41598_2020_80587_MOESM2_ESM.pdf [file 41598_2020_80587_MOESM2_ESM.pdf]
